1  
2  
3  
4  
5  
6  
7  
8  
9  
10  
11  
12  
13  
14  
15  
16  
17  
18  
19  
20  
21  
22

## Abstract

SidE family of *Legionella* effectors catalyze non-canonical phosphoribosyl-linked ubiquitination (PR-ubiquitination) of host proteins during bacterial infection. SdeA localizes predominantly to ER and partially to the Golgi apparatus, and mediates serine ubiquitination of multiple ER and Golgi proteins. Here we show that SdeA causes disruption of Golgi integrity due to its ubiquitin ligase activity. The Golgi linking proteins GRASP55 and GRASP65 are PR-ubiquitinated on multiple serine residues, thus preventing their ability to cluster and form oligomeric structures. In addition, we found that the functional consequence of Golgi disruption is not linked to the recruitment of Golgi membranes to the growing *Legionella*-containing vacuoles. Instead, it affects the secretory pathway, including cytokine release in cells. Taken together, our study sheds light on the Golgi manipulation strategy by which *Legionella* hijacks the secretory pathway and promotes bacterial infection.

1

## Introduction

2 Ubiquitination is a post-translational modification that is conserved from yeast  
3 to mammals. The catalysis of canonical ubiquitination is regulated via a three-  
4 enzyme cascade: firstly an ubiquitin (Ub) molecule is activated by an Ub-  
5 activating enzyme (E1) utilizing ATP; the activated Ub is linked to the catalytic  
6 cysteine of the E1 via its C-terminal Glycine and subsequently transferred to an  
7 Ub-conjugating enzyme (E2); finally, a Ub ligase (E3) links the carboxyl group  
8 of the ubiquitin's C-terminal glycine to the  $\epsilon$ -amino group of the target lysine in  
9 the substrate protein by an isopeptide bond (Hershko et al., 2000). Protein  
10 ubiquitination virtually regulates every cellular processes, including protein  
11 quality control, protein trafficking, immunity, and DNA repair by targeting  
12 substrates to the proteasome or altering their functions (Ben-Neriah, 2002;  
13 Dikic, 2017; Donaldson et al., 2003; Rape, 2018).

14 Consistent with the critical roles of ubiquitination in cellular processes,  
15 emerging evidence indicates that pathogens hijack the ubiquitination machinery  
16 for efficient invasion (Bomberger et al., 2011; Hicks and Galán, 2013; Maculins  
17 et al., 2016). For example, the intracellular Gram-negative pathogen *Legionella*  
18 *pneumophila* secretes more than 300 effectors into host cells via its type IV  
19 secretion system (T4SS) (Hubber and Roy, 2010). Many of these toxins  
20 function as E3 ligases and are reported to manipulate host ubiquitination (Qiu  
21 and Luo, 2017). Various studies have revealed that effectors of the SidE family  
22 (SdeA, SdeB, SdeC and SidE) catalyze an NAD<sup>+</sup>-dependent, ATP-independent

1 type of ubiquitination without the need of E2 and E3 enzymes (Bhogaraju et al.,  
2 2016; Qiu et al., 2016). Moreover, unlike the conventional ubiquitination that  
3 occurs on lysine residues of substrate proteins, SidE family effectors catalyze  
4 the conjugation of Ub via a phosphoribosyl moiety to serine residues of host  
5 substrate proteins by a two-domain catalytic relay: a mono ADP-ribosyl  
6 transferase (mART) domain that ADP-ribosylates Arg42 of Ub and a  
7 phosphodiesterase (PDE) domain that cleaves the phosphodiester bond of the  
8 ADP-ribosylated Ub (ADPR-Ub) and conjugates the resulting phosphoribosyl  
9 ubiquitin (PR-Ub) to the serine residue of a substrate (Akturk et al., 2018; Dong  
10 et al., 2018; Kalayil et al., 2018; Wang et al., 2018). PR-ubiquitination is  
11 reversible, and DupA is a deubiquitinase with specific affinity for PR-  
12 ubiquitinated substrates (Shin et al., 2020). SidE family effectors are crucial for  
13 bacterial virulence, as a *Legionella* strain lacking SidE family members shows  
14 defective growth in host cells, a phenotype that can be rescued by  
15 replenishment of SdeA (Bardill et al., 2005; Qiu et al., 2016). To date, numerous  
16 ER-associated proteins have been identified as PR-ubiquitination substrates of  
17 SdeA, such as tubular ER protein RTN4, FAM134B, and LNP1. PR-  
18 ubiquitination of these proteins is involved in regulating ER remodeling and  
19 recruiting ER membranes to *Legionella* containing vacuoles (LCV) where the  
20 bacteria resides and replicates (Kotewicz et al., 2017; Shin et al., 2020).

21 In our previous study, we used the catalytically dead mutant of the  
22 deubiquitinase DupA as a bait to identify targets of SdeA. Besides ER-related

1 substrates, we also identified proteins related to other cellular pathways,  
2 including Golgi proteins, mitochondrial proteins and components of the  
3 autophagy machinery (Shin et al., 2020). However, the biological functions of  
4 PR-ubiquitination of these proteins remained unclear. In the present study, we  
5 made use of biochemical and microbiological approaches to characterize the  
6 PR-ubiquitination of Golgi tethering proteins GRASP55 and GRASP65 by SdeA.  
7 We also provide explanations for the Golgi morphological regulation by the PR-  
8 ubiquitination of these proteins. Moreover, we demonstrate that PR-  
9 ubiquitination regulates the host cellular secretory pathway during bacterial  
10 infection.

11

## 12 **Results**

### 13 **SdeA is targeted to the ER and Golgi via its carboxyl terminus**

14 Previous structural and biochemical studies have revealed the structure of  
15 SdeA catalytic core, and the mechanism by which SdeA ubiquitinates  
16 substrates is well established (Akturk et al., 2018; Dong et al., 2018; Kalayil et  
17 al., 2018; Wang et al., 2018). However, the function of the carboxyl terminal  
18 (CT) region, predicted to be coiled-coil, remained unknown (Fig. 1A). Previous  
19 reports suggested that coiled-coil domains are required for membrane  
20 localization of many *Salmonella* type III effectors (Knodler et al., 2011). In view  
21 of that SdeA co-localizes with ER protein calnexin and ubiquitinates many ER  
22 proteins, such as RTN4 and FAM134B (Kotewicz et al., 2017; Qiu et al., 2017;

1 Shin et al., 2020), we hypothesized that the CT domain of SdeA is responsible  
2 for its membrane association. To analyze if the CT of SdeA contributes to its  
3 membrane localization and is therefore needed for the PR-ubiquitination of  
4 membrane-located substrates, we first investigated the ER localization of wild-  
5 type SdeA and truncated SdeA<sup>1-972</sup> mutant lacking the last part of the C-terminal  
6 region (Fig. 1A). COS7 cells were transfected with plasmids encoding EGFP-  
7 tagged SdeA, a truncated mutant, or EGFP alone and subsequently stained for  
8 the ER resident protein Calnexin. We observed that ectopically expressed SdeA  
9 co-localized with ER protein Calnexin in COS7 cells, consistently with a  
10 previous study (Qiu et al., 2017). In contrast and along our hypothesis that the  
11 C-terminal region of SdeA is essential for its membrane localization, truncated  
12 SdeA did not co-localize with Calnexin but showed a rather cytosolic distribution  
13 similar to the EGFP control (Fig. 1B). In addition, we observed that part of SdeA  
14 was densely localized close to the nucleus in cells (Fig. 1B). Staining with the  
15 Golgi marker GM130 revealed that this part of SdeA co-localized with the Golgi  
16 apparatus, while the truncated mutant SdeA<sup>1-972</sup> did not (Fig. 1C). We confirmed  
17 that the C-terminus region of SdeA is necessary to its Golgi localization by  
18 expressing the N-terminal-truncated SdeA<sup>909-C</sup> in cells stained with GM130.  
19 SdeA<sup>909-C</sup> expressed in cells highly overlapped with GM130, but did not disturb  
20 Golgi structure as wild-type SdeA did (Fig. 1C). This data suggests that the C-  
21 terminal part of SdeA is critical for its ER as well as its Golgi membrane  
22 localization.

1

## 2 **SdeA induces disruption of Golgi structure**

3 To investigate whether Golgi localization of SdeA is critical for its ligase function,  
4 we co-expressed wild-type SdeA or the truncated mutant SdeA<sup>1-972</sup> with its  
5 known Golgi associated substrate Rab33b (Qiu et al., 2016). Western blot  
6 analysis showed that the truncated form of SdeA could not ubiquitinate Rab33b  
7 even though it was able to ADP-ribosylate ubiquitin (Figure 2-figure supplement  
8 1A). This data suggests that the C-terminus region of SdeA is critical not only  
9 for its localization but also for its ability to ubiquitinate Golgi proteins. During our  
10 localization studies, we observed that expression of wild-type SdeA, but not the  
11 CT-truncated mutants, results in dispersed GM130 staining. This implicates an  
12 effect of SdeA activity on the structural organization of the Golgi apparatus. We  
13 then sought to investigate the possibility of PR-ubiquitination activity of SdeA  
14 regulates Golgi assembly by comparing the effects between wild-type SdeA  
15 with SdeA catalytic mutants (Fig. 1A). Expression of PDE defective mutant  
16 (SdeA H277A) or mART defective mutant (SdeA EE/AA) did not exhibit  
17 significant impact on the structure of the Golgi (Fig. 2A, B). In addition, the effect  
18 of wild-type SdeA on the Golgi structure could be counteracted by co-  
19 expression of DupA, the specific deubiquitinase for PR-ubiquitination, but not  
20 its catalytically dead mutant DupA H67A (Fig. 2A, B). These findings suggest  
21 that the Golgi disruption observed in cells expressing SdeA is likely to be  
22 caused by the accumulation of its ubiquitinated substrates. These observations

1 are in apparent agreement with previous study (Jeong et al., 2015). Similar  
2 observations were also made in HeLa cells stained with both cis (GM130) and  
3 trans (TGN46) Golgi marker antibodies (Figure 2-figure supplement 1B). In  
4 order to evaluate the physiological relevance of SdeA in triggering Golgi  
5 disruption, we infected human lung carcinoma A549 cells with either a wild-type  
6 *Legionella* strain, a mutant strain missing genes encoding SidE family proteins  
7 ( $\Delta sidEs$ ) or a mutant that does not express DupA and DupB ( $\Delta dupA/B$ ). As  
8 expected, we observed a scattering of the Golgi apparatus in cells infected with  
9 wild-type but not  $\Delta sidEs$  *Legionella* or control cells. Infection by *Legionella*  
10 without DupA/B caused more dramatic dispersal of the Golgi, compared to the  
11 wild-type *Legionella* (Fig. 2C, D). To further dissect the modulation of Golgi by  
12 SdeA, we analyzed the Golgi morphology of the cells expressing SdeA with  
13 super-resolution microscopy and electron microscopy. Data from DNA-PAINT  
14 super-resolution microscopy shows that cis Golgi protein GM130 and trans  
15 Golgi protein Golgin97 were still colocalized in cells expressing SdeA (Figure  
16 2-figure supplement 1C), which is the same with the confocal image showing  
17 the colocalization of cis and trans Golgi proteins in HeLa cells expressing SdeA  
18 (Figure 2-figure supplement 1B). These results indicate that Golgi stacking may  
19 not be affected by SdeA. Moreover, SdeA expression did not change the level  
20 of the proteins required for Golgi structure maintenance (Figure 2-figure  
21 supplement 1D). Taken all together, these data suggest that SdeA mediated  
22 PR-ubiquitination of host substrates induces disruption but not complete



1 fragmentation of Golgi ribbon.

2

3 ***In vitro* and *in vivo* validation of PR-ubiquitination of Golgi substrates by**  
4 **SdeA**

5 Using the PR-deubiquitinase DupA as a bait, we pulled-down over 180 potential  
6 host substrate proteins of SdeA upon *Legionella* infection (Shin et al., 2020).

7 Among these identified proteins, a number of ER resident proteins, and proteins  
8 related to Golgi components were highly enriched. Notably, Golgi proteins  
9 GRASP55 and GCP60 had the highest ratios among the putative Golgi protein  
10 substrates (Fig. 3A). Since GRASP55 play roles in the maintenance of the Golgi  
11 structure (Grond et al., Sohda et al., 2001), we hypothesized that SdeA modifies  
12 and inactivates Golgi proteins related to structure maintenance, thereby  
13 inducing Golgi disruption. GRASP65, which shares high sequence similarity  
14 with GRASP55, is localized to the *cis* Golgi and is also found in dispersed Golgi  
15 apparatus in cells expressing wild-type SdeA (Figure 3-figure supplement 1A).

16 *In vitro* ubiquitination assays were performed, incubating purified GRASP55 or  
17 GRASP65 with SdeA and ubiquitin for 30 min, to monitor potential PR-  
18 ubiquitination of these two Golgi proteins. We observed that SdeA is able to  
19 modify both GRASP55 and GRASP65 *in vitro* (Fig. 3B). Furthermore, cellular  
20 expression of wild-type SdeA, but not inactive PDE or mART mutants, resulted  
21 in the appearance of ubiquitinated GRASP55 and GRASP65. This PR-  
22 ubiquitination was lost when PR-ubiquitination specific deubiquitinase, DupA,

1 was co-expressed with wild-type SdeA (Fig. 3C, D). Similar observations were  
2 made for GCP60, where purified GCP60 from cells incubated with wild-type  
3 SdeA exhibited PR-ubiquitination (Figure 3-figure supplement 1B). Such  
4 modification also appeared in cells when GCP60 was co-expressed with wild-  
5 type SdeA but not upon co-expression of SdeA EE/AA mutant (Figure 3-figure  
6 supplement 1C). Along our hypothesis that SdeA is actively targeted to the  
7 Golgi, exogenous expression of CT-truncated SdeA mutants showed markedly  
8 reduced activity in modifying substrate GRASP55 (Figure 3-figure supplement  
9 1D), similar to the effect observed on PR-ubiquitination of Rab33b, indicating  
10 that Golgi localization of SdeA is important for substrate modification. Our  
11 previous work indicated that M408 and L411 are two essential amino acids in  
12 the substrate binding region of SdeA (Kalayil et al., 2018). To distinguish  
13 whether SdeA targets GRASP55 protein specifically via its substrate  
14 recognition region or if modification is an overexpression artifact and due to  
15 high amounts of SdeA located at the Golgi, we performed an *in vitro*  
16 ubiquitination assay by incubating purified GRASP55 with wild-type SdeA and  
17 SdeA ML/AA mutant, respectively. The Coomassie staining showed that the  
18 SdeA ML/AA mutant did not ubiquitinate GRASP55 (Figure 3-figure supplement  
19 1E). Similarly, GRASP55 ubiquitination is reduced in cells expressing SdeA  
20 ML/AA mutant compared to cells expressing wild type SdeA (Figure 3-figure  
21 supplement 1F) and the interaction with GRASP55 is much reduced for SdeA  
22 mutant compared to wild-type SdeA in Co-IP experiments (Figure 3-figure

1 supplement 1G). Together, these results suggest that the PR-ubiquitination of  
2 Golgi tethering proteins GRASP55, GRASP65 and GCP60 by SdeA is a  
3 selective and functional part of the hijacking strategy of *Legionella*.

4

#### 5 ***Legionella* infection causes PR-ubiquitination of GRASP55 and GRASP65**

6 To check whether these Golgi proteins are PR-ubiquitinated upon *Legionella*  
7 infection, we immunoprecipitated GFP-tagged GRASP55 and GRASP65 from  
8 HEK293T cells infected with *Legionella* strains and analyzed them for PR-  
9 ubiquitination. The results showed that both GRASP55 and GRASP65 were  
10 ubiquitinated in a time-dependent manner following *Legionella* infection (Fig.  
11 4A, B). Moreover, the ubiquitination level was increased in cells infected with  
12 the *Legionella*  $\Delta dupA/B$  mutant strain, indicating that more PR-ubiquitinated  
13 protein accumulated in the absence of the deubiquitinases (Fig. 4A, B).  
14 *Legionella* infection-induced GRASP55 and GRASP65 PR-ubiquitination was  
15 lost when cells were infected with a strain that lacks SidE family effectors  
16 ( $\Delta sidEs$ ) (Fig. 4C, D), thus, confirming that these effectors are essential for PR-  
17 ubiquitination of host substrate proteins. Similar results were obtained for  
18 GCP60 (Figure 4-figure supplement 1A). To further confirm that this detected  
19 ubiquitination is exclusively PR-ubiquitination caused by SidE family effectors  
20 directly, we incubated GRASP55 or GRASP65, isolated from infected HEK293T  
21 cells, with purified DupA. As expected, DupA was able to remove the  
22 ubiquitination of GRASP55 and GRASP65 induced by *Legionella* infection

1 (Figure 4-figure supplement 1B, C). These data suggest that SdeA PR-  
2 ubiquitinates Golgi tethering proteins GRASP55 and GRASP65 during  
3 *Legionella* infection, further supporting our hypothesis that this modification has  
4 a directed function.

5

### 6 **SdeA ubiquitinates multiple serines of GRASP55 protein**

7 Previous studies provided insights how SdeA targets and bridges Arg42 of Ub  
8 to serine residues of substrate proteins via a phosphoribosyl linker (Bhogaraju  
9 et al., 2016; Qiu et al., 2016). To gain insight into the mechanism of activity  
10 regulation of GRASP proteins by PR-ubiquitination, we used mass  
11 spectrometry to identify modified residues on GRASP55 following *in vitro*  
12 ubiquitination by SdeA (Fig. 5A). Four modified serine residues were identified  
13 in GRASP55 (S3, S408, S409, S449) (Fig. 5B, Figure 5-figure supplement 1).  
14 To further confirm these ubiquitination sites, we replaced seven serine residues  
15 (GRASP55 7S\*), including the identified serines and their adjacent serines, by  
16 either threonine (S3, S4, S449, S451) or alanine (S408, S409, S441). We  
17 observed that ubiquitination of GRASP55 in cells co-expressing SdeA was  
18 markedly decreased when the serines were replaced (Fig. 5C). Similarly, we  
19 confirmed that GRASP55 bearing the seven mutated serine residues can not  
20 be ubiquitinated when cells were infected with wild-type or  $\Delta dupA/B$  *Legionella*  
21 strains (Fig. 5D). These results confirm that these identified serines are the  
22 primary targets.

1

## 2 **PR-ubiquitination disrupts GRASP interactions**

3 Studies have shown that GRASP proteins function in the connection of Golgi  
4 stacks and thereby Golgi structure maintenance through self-interaction and  
5 interactions with Golgi matrix proteins (Grond et al., 2020; Jarvela and Linstedt,  
6 2012; Rabouille and Linstedt, 2016). Their activity can be regulated by post-  
7 translational modifications, for example, phosphorylation of serines within  
8 GRASP proteins was shown to result in Golgi fragmentation (Feinstein and  
9 Linstedt, 2008). We hypothesized that PR-ubiquitination of serines in GRASP  
10 proteins may affect self-interactions that are necessary for the connection of  
11 the Golgi stacks. To test this, we firstly PR-ubiquitinated purified GRASP55-  
12 GFP *in vitro* and then subsequently incubated the modified GRASP55 with  
13 purified His-tagged GRASP55. Co-IP analyses showed that PR-ubiquitinated  
14 GRASP55 exhibited reduced self-interaction compared to unmodified  
15 GRASP55 (Fig. 6A). This effect could also be seen in cells when the HA-tagged  
16 wild type GRASP55 or GRASP55 7S\* serine mutant were co-expressed with  
17 GFP-tagged GRASP55 7S\* in the presence of SdeA. The capacity of PR-  
18 ubiquitinated wild-type HA-GRASP55 to self-interact with GFP-GRASP55 7S\*,  
19 was decreased in comparison to SdeA resistant HA-GRASP55 7S\* (Fig. 6B).  
20 To analyze the functional impact of this observation on cells, we expressed wild-  
21 type GRASP55 or the GRASP55 7S\* serine mutant in *GRASP55/GRASP65*  
22 KO HeLa cells, and then monitored the structural stability of the Golgi in cells

1 co-expressing SdeA. As previously shown, double knockout of *GRASP55* and  
2 *GRASP65* induced dispersal of the Golgi (Bekier et al., 2017) (Figure 6-figure  
3 supplement 1). This phenotype could be rescued by ectopic expression of  
4 either wild-type *GRASP55* or *GRASP55* 7S\* (Figure 6-figure supplement 1),  
5 suggesting that serine mutations do not interfere with the function of *GRASP55*.  
6 Golgi disruption re-occurred when SdeA was concomitantly expressed with  
7 *GRASP55* (Fig. 6C, D). However, the Golgi apparatus appeared less scattered  
8 when *GRASP55* 7S\* was expressed, indicating that the higher resistance of  
9 *GRASP55* serine mutant to SdeA ubiquitination activity results in increased  
10 structural stability of the Golgi in cells expressing SdeA (Fig. 6C, D). This data  
11 indicates that SdeA-caused Golgi disruption is supposedly the result of the  
12 modification of *GRASP* proteins, disturbing the connection between Golgi  
13 stacks.

14

#### 15 ***Legionella* containing vacuole does not recruit Golgi scatters**

16 Intracellular pathogens tend to create a membrane surrounded niche for  
17 maturation, proliferation, and escape from defense mechanisms such as  
18 selective autophagy within the host cell. Along this line, *Chlamydia* infection  
19 induces Golgi fragmentation in order to generate Golgi ministacks for bacterial  
20 inclusions (Heuer et al., 2009). As for *Legionella*, *Legionella* containing  
21 vacuoles (LCVs) recruit ER membranes, thus converting the phagosome into a  
22 specific compartment that has features of ER (Kotewicz et al., 2017; Shin et al.,

1 2020; Xu and Luo, 2013). We hypothesized that *Legionella* infection induces  
2 Golgi dispersal in order to facilitate the fusion of vesicles from the Golgi with  
3 LCV to enhance the formation of LCV and, ultimately, intracellular replication.  
4 To test this hypothesis, we infected HEK293T cells overexpressing GRASP55  
5 or trans-Golgi marker GalT. The immunostaining showed that exogenous  
6 GRASP55 was recruited to LCV, however, our study recognizes the fact that  
7 exogenously overexpressed GRASP55 and GalT were shown to be partially  
8 localized in ER, which can be remodeled and recruited to LCV during infection.  
9 The recruited GRASP55 could very well be derived from the ER, and not the  
10 fragmented Golgi (Fig. 7A, B). To address whether *Legionella* indeed recruits  
11 fragmented Golgi cargo, we infected A549 cells with *Legionella*, stained cells  
12 with antibodies against endogenous cis-Golgi protein GM130 or trans-Golgi  
13 protein TGN46 and used microscopy to determine whether these Golgi markers  
14 are recruited to LCV upon infection. Immunostaining results suggested that  
15 neither cis-Golgi marker nor trans-Golgi accumulated on LCV (Fig. 7C, D).  
16 These data suggest that against our initial hypothesis *Legionella* does not  
17 disperse the Golgi simply to recruit Golgi-derived vesicles for the creation of  
18 LCVs, but that there must be another functional reasoning behind.

19

## 20 **Serine ubiquitination regulates secretory pathway in host cells**

21 In eukaryotic cells, the Golgi stack receives newly synthesized proteins from  
22 the ER, proteins then undergo modifications before being sorted via the trans-

1 Golgi network. To investigate the effect of SdeA mediated Golgi disruption on  
2 Golgi function, we performed fluorescence recovery after photobleaching  
3 (FRAP) assay, the data indicates that the recovery of fluorescence after  
4 photobleaching of marked ROI is slower in SdeA expressing cells (Figure 8-  
5 figure supplement 1). Based on this observation, we then asked that whether  
6 SdeA inhibits protein trafficking via the Golgi. Vesicular stomatitis virus  
7 glycoprotein (VSVG) is a transmembrane protein that has been widely used as  
8 a tool to monitor protein trafficking through the secretory pathway (De Jong et  
9 al., 2006; Scidmore et al., 1996). This reporter contains a thermoreversible  
10 mutation which causes its misfolding and retention in the ER at 40 °C, while at  
11 the lower temperature of 32 °C, the protein folds correctly and is exported out  
12 of the ER to the plasma membrane via the secretory pathway (Bergmann, 1989;  
13 Presley et al., 1997). To access the functionality of the Golgi apparatus upon  
14 *Legionella* infection, we used a VSVG-GFP tracker protein to follow its transit  
15 through the Golgi, stained with the Golgi marker GM130. Immunofluorescence  
16 analyses indicated that in control A549 cells or cells infected with *Legionella*  
17 SidEs deletion strain, VSVG reached its peak of accumulation in the Golgi after  
18 20 min of incubation at 32 °C, and the colocalization index then gradually  
19 decreased as the protein is trafficked from the Golgi to secretory vesicles. This  
20 process was slower in cells infected with wild-type *Legionella* or  $\Delta dupA/B$   
21 mutant strain, where maximal colocalization of VSVG with the GM130 occurred  
22 at a later time point and was more prolonged, indicating lower efficiency of



1 protein trafficking through the secretory pathway (Fig. 8A, B). This was further  
2 confirmed by monitoring the sensitivity of VSVG glycosylation to  
3 Endoglycosidase H (EndoH). EndoH is an enzyme that removes mannose rich  
4 ER resident protein but not complex forms of N-like oligosaccharides from  
5 glycoproteins that are present in the Golgi or post Golgi compartments. The  
6 transformation of a glycoprotein from EndoH sensitive to EndoH resistant form  
7 has been widely used to monitor protein trafficking through the Golgi (Burke et  
8 al., 1984; Ernst et al., 2018). To specifically analyze the effect of PR-  
9 ubiquitination on VSVG trafficking through the Golgi with EndoH cleavage, we  
10 infected HEK293T cells at 40 °C and collected cells lysates at different time  
11 points after incubation at 32 °C, before treating them with EndoH. Western blots  
12 showed that VSVG trafficking was inhibited in cells infected with wild type  
13 *Legionella* or *Legionella* DupA/B deletion strain, compared with control cells or  
14 cells infected with *Legionella*  $\Delta$ sidE strain. In control cells or cells infected with  
15 *Legionella* SidE deletion strain, the EndoH-resistant form of VSVG started to  
16 appear after 15 min incubation at 32 °C, and gradually accumulated over time,  
17 until almost all VSVG became EndoH-resistant form after 120 min. In cells  
18 infected with wild-type *Legionella*, the EndoH resistant-form of VSVG increased  
19 rather slowly, only around ~50% protein were converted to EndoH-resistant  
20 form at the same time point (Fig. 8C, D). These data further demonstrate that  
21 PR-ubiquitination caused by SidE effectors decelerates VSVG trafficking  
22 through the Golgi. This is also confirmed with a VSVG assay in cells expressing

1 SdeA (Figure 8-figure supplement 2A, B). However, SdeA expression did not  
2 change the final glycosylation of LAMP1 in cells, as no significant band shift  
3 was detected on blot (Figure 8-figure supplement 2C). This suggests that  
4 activity of SdeA slows down trafficking through the Golgi but without completely  
5 inhibiting the function of the Golgi, this is in line with the fact that the SdeA does  
6 not impair the Golgi stacking.

7 As part of immune response, macrophage cells secrete cytokines upon bacterial  
8 infection. Since ER-to-Golgi route trafficking plays an important role in  
9 conventional trafficking of most of the cytokines, and maintenance of Golgi  
10 structure is critical for secretion of some cytokines, such as TNF $\alpha$  (Micaroni et  
11 al., 2013), we decided to examine the effect of PR-ubiquitination on cytokine  
12 secretion of macrophage cells upon *Legionella* infection. THP-1 cells were  
13 treated with Phorbol 12-myristate 13-acetate (PMA) to induce differentiation to  
14 macrophage cells, then cells were infected with wild type or *Legionella* strains.  
15 Media were collected and filtered for ELISA. The ELISA results show that cells  
16 infected with *Legionella* lacking SidE family effectors released more TNF $\alpha$  than  
17 cells infected with wild-type or  $\Delta dupA/B$  *Legionella* strains (Fig. 8E). Taken  
18 together, these data demonstrate that Golgi disruption caused by SidE effectors  
19 impairs protein secretory pathway.

20

## 21 **Discussion**

1 To date, considerable effort has been focused on investigating the mechanism  
2 and substrates of novel PR-ubiquitination catalyzed by SidE family of *Legionella*  
3 effectors. However, the functional consequences of PR-ubiquitination in the  
4 regulation of cellular processes has been poorly understood. In this study, we  
5 investigated the modification of Golgi proteins catalyzed by SidE effectors and  
6 explored the consequences of PR-ubiquitination in regulating Golgi morphology  
7 and secretory pathway.

8 The Golgi protein GRASP55 was identified as one of the most enriched  
9 candidates among all PR-Ub modified substrate proteins using mass-  
10 spectrometry (Shin et al., 2020). By conducting *in vitro* reactions and MS-based  
11 analyses, we identified several serine residues in GRASP55 potentially  
12 modified by SdeA. Mutation of the identified as well as adjacent serines  
13 markedly suppressed the PR-ubiquitination of GRASP55 both in cells  
14 expressing SdeA or infected with *Legionella*. Notably, mutation of these serines  
15 did not completely abolish the ubiquitination signal from purified GRASP55,  
16 suggesting that alternative residues in GRASP55 could also be modified by  
17 SdeA. This finding is consistent to other known substrates like Rab33b, in which  
18 S154 has been identified as a ubiquitination site for SdeA, yet S154A mutation  
19 does not abrogate ubiquitination (Bhogaraju et al., 2016). SdeA appears to  
20 modify substrate serine sites independent of specific structural motifs and  
21 serines in the flexible regions are prone to be modified as shown for Rab  
22 proteins (Wang et al., 2018).

1 Immunoblotting analyses of GRASP55 purified from cells either expressing  
2 SdeA or infected with *Legionella* revealed that PR-ubiquitinated GRASP55 is  
3 detected as high molecular weight smear under long exposure. This is likely  
4 due to the multi-ubiquitination event taking place on several serines of  
5 GRASP55, besides the identified preferred serines by SdeA. This hypothesis is  
6 supported by the observation that incubation with deubiquitinase DupA  
7 eliminated the high molecular bands from ubiquitinated GRASP proteins  
8 (Figure 4-figure supplement 1).

9 GRASP proteins contain a conserved N-terminal GRASP domain that is used  
10 to localize the proteins to the Golgi as well as to tether other GRASP proteins  
11 through trans-dimerization, which can be regulated through phosphorylation of  
12 the C-terminal serine and proline rich (SPR) domain by mitotic kinases  
13 (Feinstein and Linstedt, 2008; Wang et al., 2005). Several serines in this C-  
14 terminal region of GRASP55 including S408, S409, S441, S449 identified to be  
15 PR-ubiquitinated in this study, have also been reported to be phosphorylated in  
16 previous studies (Bian et al., 2014; Kim et al., 2016). Phosphorylation mimics  
17 at these sites disrupt the homodimerization of GRASP, possibly through protein  
18 conformational changes (Kim et al., 2016; Truschel et al., 2012). Based on the  
19 findings from a study using *in vivo* GRASP55/66 depletion, Grond et al.  
20 proposed that, instead of stacking the Golgi cisternae core, GRASP proteins  
21 function in linking of the rims of Golgi cisternae and the consequent connection  
22 of Golgi stacks (Grond et al., 2020). We show that PR-ubiquitination of

1 GRASP55 also affects its homodimerization. Self-interaction of GRASP55 was  
2 diminished when the protein was PR-ubiquitinated by SdeA, both in *vitro* and *in*  
3 *vivo*. This disruption of GRASP protein homodimerization by PR-ubiquitination  
4 may lead to disconnection of Golgi stacks, but not complete fragmentation of  
5 the Golgi, which is supported by the confocal and super-resolution microscopy  
6 imaging of co-staining of cis and trans Golgi markers. Of note, in our previous  
7 study, some proteins related to, such as AKAP12, EPB41, SLK, were identified  
8 as possible substrates of SdeA (Shin et al., 2020). This may also affect the  
9 assembly of organelles including the Golgi. More studies will be needed in  
10 future to answer the question whether *Legionella* regulates cytoskeleton  
11 organization through SdeA mediated PR-ubiquitination of these cytoskeletal  
12 proteins.

13 Many pathogens have been characterized to require host organelles for their  
14 own intracellular survival and proliferation. As for *Legionella*, numerous host  
15 proteins have been detected on the LCVs. Of note, PI(4)P decoration on LCV,  
16 which functions to recruit bacterial effectors during infection, was shown to be  
17 derived directly from the Golgi body of host cells (Weber et al., 2018). However,  
18 our results indicate that *Legionella* does not recruit Golgi membrane pools  
19 containing endogenous GRASP55 or GRASP65, as these substrate proteins  
20 were not detected on the LCVs. Our data suggest that *Legionella* effectors  
21 disperse the Golgi but are not involved in the recruitment of Golgi components.  
22 This is in agreement with earlier studies, in which LCVs were purified from

1 infected host cells and analyzed using proteomics approach, but Golgi proteins  
2 were rarely identified (Schmölders et al., 2017; Urwyler et al., 2009). During our  
3 ongoing study and preparation of this manuscript, Wan and colleagues reported  
4 Golgi fragmentation upon *Legionella* infection and the PR-ubiquitination of  
5 GRASP55. In their study it was shown that GRASP55 was recruited to LCV  
6 upon *Legionella* infection (Wan et al., 2019). However, it should be noted that,  
7 unlike the endogenous GRASP55 protein that mainly localizes to the Golgi  
8 apparatus, overexpressed GRASP55 in their study was detected as largely  
9 localized to ER that could be recruited to LCV. The recruited GRASP55 could  
10 very well be derived from the ER, but not the dispersed Golgi. Recently, a study  
11 reported that PI(4)P-containing vesicles derived from Golgi are involved in  
12 mitochondria division (Nagashima et al., 2020). Given the fact that  
13 mitochondrial dynamics is tightly modulated during *Legionella* infection (Escoll  
14 et al., 2017), it is possible that *Legionella* SdeA affects mitochondria fission to  
15 facilitate bacterial replication. Further efforts will be needed to address the effect  
16 of PR-ubiquitination mediated Golgi disruption on mitochondria.

17 The Golgi apparatus plays a central role in the secretory pathway. Using VSVG  
18 as a marker, we were able to dissect the effect of SidE mediated PR-  
19 ubiquitination on protein trafficking. Our findings provide insights into the  
20 functional roles of Golgi substrate PR-ubiquitination and subsequent Golgi  
21 disruption which impacts Golgi-associated protein secretory pathway. We have  
22 shown that PR-ubiquitination decelerates VSVG trafficking through the Golgi

1 using microscopy and EndoH digestion assay. Moreover, we have found that  
2 secretion of cytokine TNF $\alpha$  was increased for THP-1 cells infected with  
3 *Legionella* lacking SidE family effectors, compared with cells infected with wild  
4 type *Legionella*. The opposite effect was observed in infection with *Legionella*  
5 missing DupA/B. This finding is consistent with previous study showing that  
6 SdeA expression inhibits secretion of secreted embryonic alkaline phosphatase  
7 reporter (SEAP) (Qiu et al., 2016).

8 Notably, multiple *Legionella* effectors have been suggested to regulate  
9 secretory pathways by yet unclear mechanisms (Machner and Isberg, 2006;  
10 Nagai et al., 2002). Identification of effectors involved in the regulation of the  
11 host secretory pathways will help us better understand both the bacterial  
12 pathogen and host cellular processes involved in infection, and thus further  
13 studies are needed.

14 Taken together, our study demonstrates that SdeA targets the Golgi and  
15 ubiquitinates Golgi tethering proteins GRASP55 and GRASP65, resulting in  
16 Golgi disruption and inhibition of secretory pathway. By revealing the biological  
17 consequences of PR-ubiquitination on Golgi proteins, our study provides a  
18 Golgi manipulation strategy, which *Legionella* utilizes to benefit bacterial  
19 infection and replication in host cells. It will be interesting to study whether PR-  
20 ubiquitination confers additional versatile mechanisms to facilitate bacterial  
21 infection by verifying more substrates of SidE effectors in future.

22

## 1 **References**

- 2 Akturk A, Wasilko DJ, Wu X, Liu Y, Zhang Y, Qiu J, Luo ZQ, Reiter KH, Brzovic  
3 PS, Klevit RE, Mao Y. 2018. Mechanism of phosphoribosyl-ubiquitination  
4 mediated by a single legionella effector. *Nature* **557**:729–745.  
5 doi:10.1038/s41586-018-0147-6
- 6 Ashida H, Sasakawa C. 2016. Bacterial E3 ligase effectors exploit host ubiquitin  
7 systems. *Curr Opin Microbiol* **35**:16–22. doi:10.1016/j.mib.2016.11.001
- 8 Bardill JP, Miller JL, Vogel JP. 2005. IcmS-dependent translocation of SdeA into  
9 macrophages by the Legionella pneumophila type IV secretion system.  
10 *Mol Microbiol*. doi:10.1111/j.1365-2958.2005.04539.x
- 11 Bekier ME, Wang L, Li J, Huang H, Tang D, Zhang X, Wang Y. 2017. Knockout  
12 of the Golgi stacking proteins GRASP55 and GRASP65 impairs Golgi  
13 structure and function. *Mol Biol Cell* **28**:2833–2842. doi:10.1091/mbc.e17-  
14 02-0112
- 15 Ben-Neriah Y. 2002. Regulatory functions of ubiquitination in the immune  
16 system. *Nat Immunol*. doi:10.1038/ni0102-20
- 17 Bergmann JE. 1989. Using Temperature-Sensitive Mutants of VSV to Study  
18 Membrane Protein Biogenesis. *Methods Cell Biol*. doi:10.1016/S0091-  
19 679X(08)61168-1
- 20 Bhogaraju S, Kalayil S, Liu Y, Bonn F, Colby T, Matic I, Dikic I. 2016.  
21 Phosphoribosylation of Ubiquitin Promotes Serine Ubiquitination and  
22 Impairs Conventional Ubiquitination. *Cell* **167**:1636-1649 e13.  
23 doi:10.1016/j.cell.2016.11.019
- 24 Bhogaraju Sagar, Kalayil S, Liu Y, Bonn F, Colby T, Matic I, Dikic I. 2016.  
25 Phosphoribosylation of Ubiquitin Promotes Serine Ubiquitination and  
26 Impairs Conventional Ubiquitination. *Cell* **167**:1636-1649.e13.  
27 doi:10.1016/j.cell.2016.11.019



- 1    Bian Y, Song C, Cheng K, Dong M, Wang F, Huang J, Sun D, Wang L, Ye M,  
2        Zou H. 2014. An enzyme assisted RP-RPLC approach for in-depth  
3        analysis of human liver phosphoproteome. *J Proteomics*.  
4        doi:10.1016/j.jprot.2013.11.014
- 5    Bomberger JM, Ye S, MacEachran DP, Koeppen K, Barnaby RL, O'Toole GA,  
6        Stanton BA. 2011. A *Pseudomonas aeruginosa* toxin that hijacks the host  
7        ubiquitin proteolytic system. *PLoS Pathog*.  
8        doi:10.1371/journal.ppat.1001325
- 9    Burke B, Matlin K, Bause E, Legler G, Peyrieras N, Ploegh H. 1984. Inhibition  
10       of N-linked oligosaccharide trimming does not interfere with surface  
11       expression of certain integral membrane proteins. *EMBO J*.  
12       doi:10.1002/j.1460-2075.1984.tb01845.x
- 13   De Jong AS, Visch HJ, De Mattia F, Van Dommelen MM, Swarts HG, Luyten T,  
14       Callewaert G, Melchers WJ, Willems PH, Van Kuppeveld FJ. 2006. The  
15       coxsackievirus 2B protein increases efflux of ions from the endoplasmic  
16       reticulum and Golgi, thereby inhibiting protein trafficking through the Golgi.  
17       *J Biol Chem*. doi:10.1074/jbc.M511766200
- 18   Dikic I. 2017. Proteasomal and Autophagic Degradation Systems. *Annu Rev*  
19       *Biochem*. doi:10.1146/annurev-biochem-061516-044908
- 20   Donaldson KM, Yin H, Gekakis N, Supek F, Joazeiro CAP. 2003. Ubiquitin  
21       signals protein trafficking via interaction with a novel ubiquitin binding  
22       domain in the membrane fusion regulator, Vps9p. *Curr Biol*.  
23       doi:10.1016/S0960-9822(03)00043-5
- 24   Dong Y, Mu Y, Xie Y, Zhang Y, Han Y, Zhou Y, Wang W, Liu Z, Wu M, Wang H,  
25       Pan M, Xu N, Xu CQ, Yang M, Fan S, Deng H, Tan T, Liu X, Liu L, Li J,  
26       Wang J, Fang X, Feng Y. 2018. Structural basis of ubiquitin modification by  
27       the *Legionella* effector SdeA /631/80/458/582 /631/326/41/2536 /631/535  
28       /631/45 /82/80 /82/83 /82/29 /82/16 /101/58 article. *Nature* **557**:674–678.

- 1       doi:10.1038/s41586-018-0146-7
- 2       Ernst AM, Syed SA, Zaki O, Bottanelli F, Zheng H, Hacke M, Xi Z, Rivera-Molina  
3       F, Graham M, Rebane AA, Björkholm P, Baddeley D, Toomre D, Pincet F,  
4       Rothman JE. 2018. S-Palmitoylation Sorts Membrane Cargo for  
5       Anterograde Transport in the Golgi. *Dev Cell*.  
6       doi:10.1016/j.devcel.2018.10.024
- 7       Escoll P, Song OR, Viana F, Steiner B, Lagache T, Olivo-Marin JC, Impens F,  
8       Brodin P, Hilbi H, Buchrieser C. 2017. Legionella pneumophila Modulates  
9       Mitochondrial Dynamics to Trigger Metabolic Repurposing of Infected  
10      Macrophages. *Cell Host Microbe*. doi:10.1016/j.chom.2017.07.020
- 11      Feinstein TN, Linstedt AD. 2008. GRASP55 regulates Golgi ribbon formation.  
12      *Mol Biol Cell*. doi:10.1091/mbc.E07-11-1200
- 13      Grond, R., Veenendaal, T., Duran, J. M., Raote, I., van Es, J. H., Corstjens, S.,  
14      Delfgou, L., El Haddouti, B., Malhotra, V., & Rabouille C. 2020. The function  
15      of GORASPs in Golgi apparatus organization in vivo. *J Cell Biol*.  
16      doi:10.1083/jcb.202004191
- 17      Hershko A, Ciechanover A, Varshavsky A. 2000. The ubiquitin system. *Nat Med*.  
18      doi:10.1038/80384
- 19      Heuer D, Lipinski AR, Machuy N, Karlas A, Wehrens A, Siedler F, Brinkmann V,  
20      Meyer TF. 2009. Chlamydia causes fragmentation of the Golgi  
21      compartment to ensure reproduction. *Nature* **457**:731–735.  
22      doi:10.1038/nature07578
- 23      Hicks SW, Galán JE. 2013. Exploitation of eukaryotic subcellular targeting  
24      mechanisms by bacterial effectors. *Nat Rev Microbiol*.  
25      doi:10.1038/nrmicro3009
- 26      Hubber A, Roy CR. 2010. Modulation of Host Cell Function by Legionella  
27      pneumophila Type IV Effectors . *Annu Rev Cell Dev Biol*.  
28      doi:10.1146/annurev-cellbio-100109-104034

- 1 Jarvela T, Linstedt AD. 2012. Golgi GRASPs: Moonlighting membrane tethers.  
2 *Cell Health Cytoskelet.* doi:10.2147/CHC.S21849
- 3 Jeong KC, Sexton JA, Vogel JP. 2015. Spatiotemporal Regulation of a  
4 *Legionella pneumophila* T4SS Substrate by the Metaeffector SidJ. *PLoS*  
5 *Pathog.* doi:10.1371/journal.ppat.1004695
- 6 Jubelin G, Frédéric T, Duda DM, Hsu Y, Samba-Louaka A, Nobe R, Penary M,  
7 Watrin C, Nougayréde JP, Schulman BA, Stebbins CE, Oswald E. 2010.  
8 Pathogenic bacteria target NEDD8-conjugated cullins to hijack host-cell  
9 signaling pathways. *PLoS Pathog.* doi:10.1371/journal.ppat.1001128
- 10 Kalayil S, Bhogaraju S, Bonn F, Shin D, Liu Y, Gan N, Basquin J, Grumati P,  
11 Luo ZQ, Dikic I. 2018. Insights into catalysis and function of  
12 phosphoribosyl-linked serine ubiquitination. *Nature* **557**:734–738.  
13 doi:10.1038/s41586-018-0145-8
- 14 Kim J, Noh SH, Piao H, Kim DH, Kim K, Cha JS, Chung WY, Cho HS, Kim JY,  
15 Lee MG. 2016. Monomerization and ER Relocalization of GRASP Is a  
16 Requisite for Unconventional Secretion of CFTR. *Traffic.*  
17 doi:10.1111/tra.12403
- 18 Knodler LA, Ibarra JA, Pérez-Rueda E, Yip CK, Steele-Mortimer O. 2011.  
19 Coiled-coil domains enhance the membrane association of *Salmonella*  
20 type III effectors. *Cell Microbiol.* doi:10.1111/j.1462-5822.2011.01635.x
- 21 Kotewicz KM, Ramabhadran V, Sjoblom N, Vogel JP, Haenssler E, Zhang M,  
22 Behringer J, Scheck RA, Isberg RR. 2017. A Single *Legionella* Effector  
23 Catalyzes a Multistep Ubiquitination Pathway to Rearrange Tubular  
24 Endoplasmic Reticulum for Replication. *Cell Host Microbe* **21**:169–181.  
25 doi:10.1016/j.chom.2016.12.007
- 26 Machner MP, Isberg RR. 2006. Targeting of Host Rab GTPase Function by the  
27 Intravacuolar Pathogen *Legionella pneumophila*. *Dev Cell.*  
28 doi:10.1016/j.devcel.2006.05.013

- 1 Maculins T, Fiskin E, Bhogaraju S, Dikic I. 2016. Bacteria-host relationship:  
2 ubiquitin ligases as weapons of invasion. *Cell Res* **26**:499–510.  
3 doi:10.1038/cr.2016.30
- 4 Micaroni M, Stanley AC, Khromykh T, Venturato J, Wong CXF, Lim JP, Marsh  
5 BJ, Storrie B, Gleeson PA, Stow JL. 2013. Rab6a/a' Are Important Golgi  
6 Regulators of Pro-Inflammatory TNF Secretion in Macrophages. *PLoS*  
7 *One* **8**. doi:10.1371/journal.pone.0057034
- 8 Nagai H, Kagan JC, Zhu X, Kahn RA, Roy CR. 2002. A bacterial guanine  
9 nucleotide exchange factor activates ARF on Legionella phagosomes.  
10 *Science (80- )*. doi:10.1126/science.1067025
- 11 Nagashima S, Tábara LC, Tilokani L, Paupe V, Anand H, Pogson JH, Zunino R,  
12 McBride HM, Prudent J. 2020. Golgi-derived PI(4)P-containing vesicles  
13 drive late steps of mitochondrial division. *Science (80- )*.  
14 doi:10.1126/science.aax6089
- 15 Presley JF, Cole NB, Schroer TA, Hirschberg K, Zaal KJM, Lippincott-Schwartz  
16 J. 1997. ER-to-Golgi transport visualized in living cells. *Nature*.  
17 doi:10.1038/38001
- 18 Qiu J, Luo ZQ. 2017. Legionella and Coxiella effectors: strength in diversity and  
19 activity. *Nat Rev Microbiol* **15**:591–605. doi:10.1038/nrmicro.2017.67
- 20 Qiu J, Sheedlo MJ, Yu K, Tan Y, Nakayasu ES, Das C, Liu X, Luo ZQ. 2016.  
21 Ubiquitination independent of E1 and E2 enzymes by bacterial effectors.  
22 *Nature* **533**:120–124. doi:10.1038/nature17657
- 23 Qiu J, Yu K, Fei X, Liu Y, Nakayasu ES, Piehowski PD, Shaw JB, Puvar K, Das  
24 C, Liu X, Luo ZQ. 2017. A unique deubiquitinase that deconjugates  
25 phosphoribosyl-linked protein ubiquitination. *Cell Res*.  
26 doi:10.1038/cr.2017.66
- 27 Rabouille C, Linstedt AD. 2016. GRASP: A multitasking tether. *Front Cell Dev*  
28 *Biol* **4**:1–8. doi:10.3389/fcell.2016.00001

- 1 Rape M. 2018. Ubiquitylation at the crossroads of development and disease.  
2 *Nat Rev Mol Cell Biol* **19**:59–70. doi:10.1038/nrm.2017.83
- 3 Schmölders J, Manske C, Otto A, Hoffmann C, Steiner B, Welin A, Becher D,  
4 Hilbi H. 2017. Comparative proteomics of purified pathogen vacuoles  
5 correlates intracellular replication of *Legionella pneumophila* with the small  
6 GTPase ras-related protein 1 (Rap1). *Mol Cell Proteomics*.  
7 doi:10.1074/mcp.M116.063453
- 8 Scidmore MA, Fischer ER, Hackstadt T. 1996. Sphingolipids and glycoproteins  
9 are differentially trafficked to the *Chlamydia trachomatis* inclusion. *J Cell*  
10 *Biol*. doi:10.1083/jcb.134.2.363
- 11 Shin D, Mukherjee R, Liu Yaobin, Gonzalez A, Bonn F, Liu Yan, Rogov V V.,  
12 Heinz M, Stolz A, Hummer G, Dötsch V, Luo ZQ, Bhogaraju S, Dikic I. 2020.  
13 Regulation of Phosphoribosyl-Linked Serine Ubiquitination by  
14 Deubiquitinases DupA and DupB. *Mol Cell*.  
15 doi:10.1016/j.molcel.2019.10.019
- 16 Shorter J, Watson R, Giannakou ME, Clarke M, Warren G, Barr FA. 1999.  
17 GRASP55, a second mammalian GRASP protein involved in the stacking  
18 of Golgi cisternae in a cell-free system. *EMBO J*.  
19 doi:10.1093/emboj/18.18.4949
- 20 Sohda M, Misumi Y, Yamamoto A, Yano A, Nakamura N, Ikehara Y. 2001.  
21 Identification and Characterization of a Novel Golgi Protein, GCP60, that  
22 Interacts with the Integral Membrane Protein Giantin. *J Biol Chem*.  
23 doi:10.1074/jbc.M108961200
- 24 Truschel ST, Zhang M, Bachert C, Macbeth MR, Linstedt AD. 2012. Allosteric  
25 regulation of GRASP protein-dependent golgi membrane tethering by  
26 mitotic phosphorylation. *J Biol Chem*. doi:10.1074/jbc.M111.326256
- 27 Urwyler S, Nyfeler Y, Ragaz C, Lee H, Mueller LN, Aebersold R, Hilbi H. 2009.  
28 Proteome analysis of *Legionella* vacuoles purified by magnetic

1 immunoseparation reveals secretory and endosomal GTPases. *Traffic*.  
2 doi:10.1111/j.1600-0854.2008.00851.x

3 Wan M, Sulpizio AG, Akturk A, Beck WHJ, Lanz M, Faça VM, Smolka MB,  
4 Vogel JP, Mao Y. 2019. Deubiquitination of phosphoribosyl-ubiquitin  
5 conjugates by phosphodiesterase-domain-containing Legionella effectors.  
6 *Proc Natl Acad Sci U S A*. doi:10.1073/pnas.1916287116

7 Wang Y, Satoh A, Warren G. 2005. Mapping the functional domains of the Golgi  
8 stacking factor GRASP65. *J Biol Chem*. doi:10.1074/jbc.M412407200

9 Wang Y, Shi M, Feng H, Zhu Y, Liu S, Gao A, Gao P. 2018. Structural Insights  
10 into Non-canonical Ubiquitination Catalyzed by SidE. *Cell* **173**:1231-  
11 1243.e16. doi:10.1016/j.cell.2018.04.023

12 Weber S, Steiner B, Welin A, Hilbi H. 2018. Legionella-Containing Vacuoles  
13 Capture PtdIns(4)P-Rich Vesicles Derived from the Golgi Apparatus. *MBio*  
14 **9**. doi:10.1128/mBio.02420-18

15 Xu L, Luo ZQ. 2013. Cell biology of infection by Legionella pneumophila.  
16 *Microbes Infect*. doi:10.1016/j.micinf.2012.11.001

17

18

19

20

21

22

23

24

25

26

27

28

## 1 **Materials and Methods**

2

### 3 **Antibodies and reagents**

4 All reagents were from Sigma, Roche or Roth. The following antibodies were  
5 used: antibodies against HA (C29F4), GFP (sc-9996), GRASP65 (sc-374423),  
6 from Santa Cruz; ubiquitin (P4BD) and ubiquitin (ab7254) from Cell signaling  
7 and Abcam respectively; mCherry (ab125096), Tubulin (ab6046), Calnexin  
8 (ab22595), *Legionella* (ab20943) from abcam; GM130 (D6B1), GAPDH  
9 (D16H11) from Cell signaling; GM130 (610823) from BD for IF only ; GRASP55  
10 (10598-1-AP) from proteintech, TGN46 (AHP500) from Biorad. Monoclonal  
11 Anti-HA–Agarose antibody (HA-7) was purchased from Sigma.

12

### 13 **Cloning and mutagenesis**

14 For protein expression in mammalian cells, GFP or mCherry tagged DupA, wild-  
15 type EGFP-SdeA and catalytically defective mutants SdeA H277A and SdeA  
16 EEAA were generated as described previously (Sagar Bhogaraju et al., 2016).  
17 SdeA plasmids were digested with BamHI and XhoI, then inserted into  
18 mCherry-C1 vectors digested with BamHI and XhoI to generate N terminally  
19 mCherry tagged wild-type and mutated SdeA. Deletion of SdeA was designed  
20 according to the known structure and sequence prediction analyses. Truncated  
21 deletions SdeA<sup>1-972</sup> and SdeA<sup>909-C</sup> were amplified from full-length SdeA cDNA  
22 and digested with BamHI and XhoI. The digested DNA fragments were inserted

1 into pEGFP-C1 vectors digested with BamHI and XhoI. GFP or HA tagged  
2 GRASP55 and GRASP65-GFP were generated by PCR from GRASP55 or  
3 GRASP65 cDNA and digested with XhoI and BamHI or HindIII and KpnI  
4 respectively, then inserted into pEGFP-N1 or pHA-N1 vector. For generation of  
5 the GRASP55 7S\* mutant, identified serines and adjacent serines S3, S4, S449,  
6 S451 were mutated to threonine to minimally effect the physio-chemical  
7 properties of these amino acids, in addition, S408, S409, S441 were mutated  
8 to alanine by site-directed mutagenesis. For protein expression in *E. coli*, SdeA  
9 was amplified from SdeA cDNA and digested with BamHI and XhoI. The  
10 digested DNA fragments were inserted into pGEX-6p-1 vector digested with  
11 BamHI and XhoI. GRASP55 and GRASP65 cDNA were amplified from  
12 mammalian vector and digested with NdeI and BamHI and cloned into pET15b  
13 and pGEX-6p-1 vector respectively. Serine to threonine or alanine mutations  
14 were generated by site-directed mutagenesis.

15

## 16 **Cell lines culture and Transfection**

17 HEK293T, A549, COS7 cells were purchased from ATCC. Cells were cultured  
18 in high glucose Dulbecco's Modified Eagles Medium (DMEM) supplemented  
19 with 10% fetal bovine serum (FBS), 100 U/mL penicilin and 100 mg/mL  
20 streptomycin at 37 °C, 5% CO<sub>2</sub> in a humidified incubator. Transfection was  
21 performed using polyethyleneimine (PEI) reagent or Genejuice (Merck).

22



## 1 ***Legionella* culture and infection**

2 *Legionella* strains were obtained from Dr. Zhao-Qing Luo lab (Purdue  
3 University). Cells were streaked and cultured at 37°C on N-(2-acetamido)-2-  
4 aminoethanesulfonic acid (ACES)-buffered charcoal-yeast extract (BCYE) agar  
5 plates for 3 days, followed by inoculation and growth for 20 h in 3 mL CYE liquid  
6 media. Post-exponential *Legionella* with OD<sub>600</sub> between 3.6-3.8 were used to  
7 infect A549 or HEK293T cells. HEK293T cells were transfected with FCyRII and  
8 GRASP55-GFP or GRASP65-GFP for 24 hrs. Indicated *Legionella* strains were  
9 opsonized with antibody against *Legionella* (1: 500) at 37 °C for 30 min before  
10 infection. The HEK293T cells were infected with different *Legionella* strains at  
11 an MOI of 2 (for confocal imaging), or 10 (for Western blot) for the indicated  
12 time.

13

## 14 **SdeA mediated PR-ubiquitination reaction**

15 SdeA mediated PR-Serine ubiquitination *in vitro* reaction was done as  
16 previously described (Kalayil et al., 2018). Briefly, 5 μM GRASP proteins were  
17 incubated with 1 μM of SdeA and 25 of μM ubiquitin in the presence of 200 μM  
18 of NAD<sup>+</sup> in 40 μL of reaction buffer (50 mM NaCl and 50 mM Tris, pH 7.5) for 1  
19 hour at 37 °C. Deubiquitination assay were performed by incubating PR-  
20 ubiquitinated proteins with 1 μg of GST-DupA at 37 °C for 1 h in reaction buffer  
21 (150 mM NaCl, 50 mM Tris-HCl pH 7.5). The reaction products were analyzed  
22 by SDS-PAGE with Coomassie staining or western blotting using antibodies

1 against GST (cell signaling technology), His (Roche), GRASP55 (Proteintech),  
2 GRASP65 (Sino biotech.), Ub (Abcam, or Cell signaling technology). To assess  
3 the PR-ubiquitination of GRASP55 and GRASP65 in cells, plasmids for  
4 expression of GRASPs-GFP, GFP-SdeA or mCherry-SdeA, were co-  
5 transfected into HEK293T cells, cells were then cultured at 37 °C for 24 h.  
6 Whole cell lysates were subjected to immunoprecipitation with GFP-trap beads  
7 and the products or the whole cell lysates were separated with SDS-PAGE and  
8 blotted with antibodies against GFP or GRASP proteins.

9

#### 10 **Western blotting and Immunoprecipitation**

11 Cell lysates or immunoprecipitated proteins were mixed with SDS sample buffer,  
12 heated at 95 °C for 5 min, centrifuged, and separated by Tris-Glycine SDS-  
13 PAGE, and transferred to PVDF membrane (Millipore) at cold room. Blots were  
14 blocked with 5% nonfat milk for 1 hour at room temperature and incubated with  
15 primary antibodies overnight at cold room or 2 hours at room temperature and  
16 washed with TBST (0.1% Tween 20 in TBS) three times. The blots were further  
17 incubated with secondary antibodies for 1 h at room temperature and washed  
18 3 times with TBST. The blots were incubated with ECL reagents (advansta),  
19 and chemiluminescence was acquired with the Bio-Rad ChemiDoc system. For  
20 immunoprecipitation, HEK293T cells expressing GFP or HA-tagged proteins  
21 were lysed with mild immunoprecipitation buffer containing 150 mM NaCl, 50  
22 mM Tris-HCl, pH 7.5, 0.5% NP40, 1 mM PMSF, protease inhibitor cocktail

1 (Sigma Aldrich), mixed with 10  $\mu$ L GFP-trap or HA antibody conjugated agarose,  
2 and incubated for 4 h in cold room with end to end rotation. Beads were washed  
3 3 times in IP buffer containing 500 mM NaCl. Proteins were eluted by  
4 resuspending with 2X SDS sample buffer followed by boiling for 5 min at 95 °C.  
5 Samples were then submitted to western blotting analysis.

6

### 7 **Protein expression and purification**

8 GRASP55 and GRASP65 cDNA were cloned into p15b and pGEX-6p-1 vector  
9 respectively. Full-length SdeA was cloned into pGEX-6P-1 vector. *E. coli*  
10 competent cells (NEB T7 express) were transformed with plasmid, colonies  
11 were inoculated and cultured in LB medium overnight at 37 °C, The next day 5  
12 mL culture was transferred to 1 L flask for further culture at 37 °C until the OD<sub>600</sub>  
13 reaches to 0.6-0.8. Protein expression was induced by adding 0.5 mM IPTG  
14 and cells were further cultured overnight at 18 °C. The cells were harvested  
15 and the cell pellet was resuspended in lysis buffer (300 mM NaCl, 50 mM Tris-  
16 HCl pH 7.5) followed with sonication and centrifuged at 13,000 rpm to clarify  
17 the supernatant. Clarified lysates were then incubated with TALON beads or  
18 glutathione-S-Sepharose pre-equilibrated with washing buffer. Once eluted,  
19 proteins were further concentrated with filters and then purified by anion  
20 exchange chromatography on HitrapQ (GE Healthcare) and collected fractions  
21 were further loaded onto size exclusion column (Superdex 75 16/60, GE  
22 Healthcare). Proteins were concentrated and used for *in vitro* reaction.

## 1 **Identification of PR-ubiquitination serine sites on GRASP55**

2 His-GRASP55 were purified from *E. coli* and PR-ubiquitinated by SdeA *in vitro*.  
3 Samples were prepared as previously described (Bhogaraju et al., 2016; Kalayil  
4 et al., 2018). Briefly, added urea buffer containing 8 M urea, 0.1 M Tris, pH 7.5  
5 to the reaction mixture to a final volume of 200  $\mu$ L, the reactions were then  
6 transferred to 30 kDa filter (Amicon Ultra, 0.5 mL, Merck) and washed 3 times  
7 with 200  $\mu$ L of urea buffer by centrifugation to remove free ubiquitin. Proteins  
8 were washed 2 times with 50 mM ABC, pH 7.5, then digested with trypsin in 50  
9 mM ABC pH 7.5 at trypsin to protein ratio 1:50 for 6 h and subsequently  
10 desalted by C18 and analyzed by LC MS/MS.

11

## 12 **Data quantification**

13 Data shown in Figure 2B, 2D, 6D, 8B, 8D, 8E were analyzed with GraphPad  
14 Prism 5.0. Three independent experiments were performed, p values were  
15 determined using unpaired two-tailed t test, \*\*\*, \*\*, \* and ns represent  $p < 0.0001$ ,  
16  $p < 0.01$ ,  $p < 0.05$  and not significant respectively. For Figure 2B and 2D, more  
17 than 70 SdeA transfected or *Legionella* infected cells were examined from 3  
18 replicates of each condition. Values of percentage of cells with fragmented  
19 Golgi were input into GraphPad Prism, and analyzed. For Figure 6D, Golgi  
20 areas of more than 60 cells from 3 replicates of each condition were measured  
21 with ImageJ software. For Figure 8B, data represents 30 cells taken from 3  
22 independent experiments. For Figure 8D, gray values of VSVG bands shown

1 as Figure 8C from 3 replicates were measured with ImageJ.

2

### 3 **VSVG trafficking assay**

4 HEK293T or A549 cells were co-transfected with VSVG-GFP and FcγRII or  
5 transfected with VSVG-GFP respectively and cultured at 37 °C for 24 h to  
6 express the proteins before being transferred to 40 °C. After 16 h incubation at  
7 40 °C, cycloheximide was added into medium to inhibit further protein synthesis,  
8 after 2 h treatment cells were infected with *Legionella* for another 2 h then  
9 washed 3 times with PBS and cultured with fresh medium at 32 °C to remove  
10 the bacteria outside host cells, and then moved to 32 °C for different time points  
11 to release VSVG from ER. A549 cells were fixed and VSVG trafficking was  
12 acquired with confocal microscopy after immunofluorescence staining. DAPI  
13 marks nucleus and cytosolic bacteria. For calculating Manders coefficient in  
14 FIJI, ROIs of 30 μm<sup>2</sup> are chosen from the perinuclear region containing the  
15 Golgi marked by GM130. Manders coefficient is calculated using Coloc2 plugin  
16 in FIJI and denotes fraction of VSVG-GFP pixels that is positive for GM130. For  
17 EndoH cleavage assay, HEK293T cells were lysed with lysis buffer containing  
18 1% SDS, 50mM Tris, pH 8.0. Benzonase was added to reduce the viscosity  
19 caused by released DNA. Cell lysates were mixed with denaturing buffer then  
20 boiled for 10 min at 95 °C. Denatured proteins were incubated with EndoH for  
21 3 h at 37 °C to cleave the EndoH sensitive form of glycosylation, final products  
22 were separated with SDS-PAGE and the EndoH-caused band shift was

1 analyzed by blotting GFP.

2

### 3 **ELISA**

4 To investigate the effect of PR-ubiquitination on secretion pathway, we  
5 analyzed the secretion of pro-inflammatory cytokine in PMA-treated THP-1  
6 cells upon infection with *L. pneumophila*. Cytokine secretion analysis was  
7 performed with ELISA kit ordered from R&D system (TNF $\alpha$ : DY210-05)  
8 according to the manufacturer's instruction.

9

### 10 **Immunofluorescence**

11 HEK293T, COS7 or A549 cells were seeded on a coverslip in 12-well plates  
12 and cultured in CO<sub>2</sub> incubator. Next day cells were transfected with plasmids  
13 encoding SdeA. The immunostaining was performed following the protocol  
14 previously described (Bhogaraju et al., 2016). Briefly, cells were washed once  
15 with PBS, pH 7.4, and fixed with 4% paraformaldehyde (PFA) in PBS for 10 min  
16 at room temperature. Cells were washed again with PBS 2 times, then  
17 permeabilized with 0.1% saponin in PBS for 10 min, and blocked with blocking  
18 buffer containing 0.1% saponin and 2% BSA in PBS for 1 h at room temperature.  
19 Cells were stained with antibodies diluted in blocking buffer overnight at 4 °C  
20 and washed with PBS three times next day. Cells were further incubated with  
21 Alexa Flour dyes-conjugated secondary antibodies for 1 h at room temperature  
22 in the dark and washed with PBS and incubated with DAPI in PBS, followed

1 with further 2 times washing with PBS. Confocal imaging was performed using  
2 the Zeiss LSM780 microscope system. Images were analyzed with Fiji software.

3

#### 4 **DNA-PAINT super-resolution Imaging**

5 COS7 cells were fixed with prewarmed (37 °C) 4% methanol-free formaldehyde  
6 (Sigma-Aldrich, Germany) in PBS for 10 min followed by three washing steps  
7 with PBS. Cells were quenched with 0.1% NaBH<sub>4</sub> (Sigma Aldrich, Germany) for  
8 7 min in PBS and washed thrice with PBS. Fixed cells were permeabilized and  
9 blocked in permeabilization/blocking-buffer, followed by incubation of primary  
10 antibodies against GM130 and Golgin 97 in permeabilization/blocking buffer for  
11 90 min. Washed cells were then incubated with DNA-labeled secondary  
12 antibodies for 1 h and washed again. Finally, samples were post-fixed using 4%  
13 methanol-free formaldehyde for 10 min at room-temperature followed by three  
14 washing steps with PBS. For sequential DNA-PAINT imaging, 125 nm gold-  
15 beads (Nanopartz, USA) were used as fiducial markers. Exchange DNA-PAINT  
16 measurements were performed at the N-STORM super-resolution microscopy  
17 system (Nikon, Japan) equipped with an oil immersion objective (Apo, 100x,  
18 NA 1.49) and an EMCCD camera (DU-897U-CS0-#BV, Andor Technology,  
19 Ireland).

20

21

22

23

24

25

26

## 1 **Acknowledgments**

2 We thank Zhao-Qing Luo for the kind gift of *Legionella* strains (wild-type and  
3  $\Delta$ *sidEs*, Hubert Hilbi for the kind gift of *Legionella* expressing dsRed,  
4 Yanzhuang Wang for the kind gift of GRASP55/65 Knockout HeLa cell line;  
5 Mohit Misra, Anne-Claire Jacomin and Alexandra Stolz for discussion and  
6 critical reading of the manuscript. This project was funded by European  
7 Research Council (ERC) under the European Union's Horizon 2020 research  
8 and innovation programme (I.D., grant agreement No 742720), and LOEWE  
9 Main Research Focus DynaMem of the German Federal State of Hesse (to I.D.).  
10 Work in Ivan Matic's laboratory was funded by the Deutsche  
11 Forschungsgemeinschaft (DFG, German Research Foundation) under  
12 Germany's Excellence Strategy-CECAD, EXC 2030-390661388 (to I.M.), and  
13 the EMBO Young Investigator Programme (to I.M.)

14

## 15 **Author contributions**

16 Y.L. and I.D. designed the study and experiments. R.M. performed the VSVG  
17 trafficking experiment. F.B., T.C. and I.M. performed mass spectrometry  
18 experiments and data-analysis. Y.L. performed biochemical, cell biological and  
19 bacterial infection experiments and data-analysis. M.G. and M.H. performed  
20 DNA-PAINT super-resolution microscopy imaging. Y.L. and I.D. wrote the  
21 manuscript and all authors commented on it.

22



1

## 2 **Figure legends**

3

### 4 **Figure 1. SdeA partially localizes to the Golgi**

5 (A) Schematic diagrams of full-length wild-type SdeA, SdeA catalytic mutant SdeA H277A or  
6 SdeA EE/AA, truncated SdeA<sup>1-972</sup> and SdeA<sup>909-C</sup>. (B) Confocal images showing the co-  
7 localization of SdeA (green) with ER protein Calnexin (red). COS7 cells were transfected with  
8 plasmids encoding GFP-tagged wild type SdeA or truncated mutant. Cells were cultured for 24  
9 hours after transfection, then fixed, permeabilized, and stained with Calnexin antibody and  
10 visualized using confocal microscope. (C) Confocal images showing the co-localization of SdeA  
11 (green) with Golgi protein GM130 (red). Cells were cultured for 24 hours after transfection, then  
12 fixed, permeabilized, and ultimately stained with GM130 antibody and visualized using confocal  
13 microscope.

14

### 15 **Figure 2. Legionella effector SdeA mediates Golgi fragmentation in cells.**

16 (A) Confocal images showing Golgi (red) fragmentation caused by exogenously expressed  
17 SdeA (green). GFP-tagged SdeA wild-type or catalytically defective mutants were expressed  
18 or co-expressed with DupA in COS7 cells. Cells were cultured for 24 hours after transfection  
19 then fixed with 4% PFA. (B) Quantification of the percentage of cells with dispersed Golgi in  
20 (A). Data are shown as means  $\pm$  SEM of more than 60 cells taken from three independent  
21 experiments. \*\*\*P<0.001. (C) Confocal images showing Golgi fragmentation caused by  
22 *Legionella*. A549 cells were infected with wild-type or mutant *Legionella* as indicated. Cells  
23 were washed 3 times with PBS after 2 hours infection to remove non-phagocytosed bacteria,  
24 then fixed with 4% PFA and stained with indicated antibodies. (D) Quantification of the  
25 percentage of cells with dispersed Golgi in (C) Data are shown as means  $\pm$  SEM of more than  
26 70 cells taken from three independent experiments. Data were analyzed with unpaired t test,  
27 \*\*\*P<0.001, \*P<0.01, \*P<0.05.

28

### 29 **Figure 2-figure supplement 1**

1 (A) Western blot analysis of modification of Golgi protein substrate by wild-type GFP-tagged  
2 SdeA or SdeA<sup>1-972</sup> missing membrane targeting region. HEK293T cells were transfected with  
3 full-length or truncated SdeA, cells were lysed and blotted after 24 hours transfection. (B)  
4 Confocal images showing SdeA expression fragments the Golgi in HeLa cells. GFP-tagged  
5 SdeA wild type or catalytically defective mutants were expressed in HeLa cells. Cells were  
6 cultured for 24 hours after transfection then fixed with 4% PFA, after permeabilization, cells  
7 were stained with antibodies against cis-Golgi and trans-Golgi markers GM130 and TGN46. (C)  
8 DNA-PAINT super-resolution microscopy images of COS7 cells expressing SdeA. Fixed cells  
9 were incubated with primary antibodies against cis-Golgi and trans-Golgi markers GM130 and  
10 Golgin97, followed by incubation with secondary antibodies labeled with short oligonucleotide  
11 sequences. Data acquisition was performed with the N-STORM super-resolution microscopy  
12 system. (D) Western blot analysis of Golgi proteins GM130 and Golgin45 in cells expressing  
13 SdeA.

### 14 **Figure 3. SdeA ubiquitinates Golgi tethering factor GRASP proteins**

15 (A) Potential ER and Golgi protein substrates of SdeA identified by mass spectrometry. Values  
16 indicate intensity ratios between proteins enriched from samples infected with different  
17 *Legionella* strains ( $\Delta dupA/B$  over  $\Delta sidE$ ). Among the substrate candidates, Golgi tethering  
18 factor GRASP55 (red) is one of the highly ubiquitinated proteins. (B) GRASP55 and GRASP65  
19 ubiquitination by SdeA *in vitro*. Purified GRASP55 or GRASP65 were incubated with SdeA in  
20 the presence of NAD<sup>+</sup> and ubiquitin. Reaction products were separated with SDS-PAGE and  
21 then stained with Coomassie blue or blotted with antibodies against ubiquitin, GRASP55 or  
22 GRASP65. (C) Modification of GRASP55 by exogenous SdeA in cells. HEK293T cells were  
23 transfected with wild type SdeA or indicated SdeA mutants, after 24 hours cells were collected  
24 and lysed, the total cell lysates were separated with SDS-PAGE and blotted with antibody  
25 against GRASP55. (D) Modification of GRASP65 by exogenous SdeA in cells. HEK293T cells  
26 were transfected with wild type SdeA or indicated SdeA mutants, after 24 hours cells were  
27 collected and lysed, GFP-tagged GRASP65 proteins were isolated from cell lysate and  
28 separated with SDS-PAGE followed by blotting with antibody against GFP.

29

### 30 **Figure 3-figure supplement 1. SdeA ubiquitinates Golgi tethering proteins**

1 (A) Confocal images showing Golgi localization of endogenous GRASP55 and GRASP65. (B)  
2 GCP60 ubiquitination by SdeA *in vitro*. Purified Myc-tagged GCP60 was incubated with SdeA  
3 in the present of NAD<sup>+</sup> and ubiquitin. Reaction products were blotted with antibodies against  
4 ubiquitin or Myc. (C) Modification of GCP60 by exogenous SdeA in cells. HEK293T cells were  
5 co-transfected with GCP60 and wild type SdeA or SdeA mutant, after 24 hours cells were  
6 collected and lysed, followed with Myc-IP. IP products were washed and separated with SDS-  
7 PAGE and blotted with antibody. (D) Modification of Golgi substrate GRASP55 by wild-type  
8 SdeA or SdeA<sup>1-972</sup> missing membrane targeting region. (E) *In vitro* reaction of wild-type or  
9 ML/AA mutant with purified GRASP55. Reaction products were separated with SDS-PAGE and  
10 then stained with Coomassie blue. Ubiquitinated GRASP55 bands were indicated. (F) Analysis  
11 of the effect of SdeA ML/AA mutant on PR-ubiquitination of GRASP55 in cells. (G) Assay of  
12 protein interaction between SdeA and GRASP55. HEK293T cells were transfected with GFP-  
13 tagged wild-type SdeA or SdeA ML/AA mutant, after 24 hours cells were lysed and GFP fusion  
14 proteins were isolated with GFP-trap beads. Then the pulled-down proteins were separated  
15 with SDS-PAGE and blotted with antibody against GRASP55.

16

17 **Figure 4. *Legionella* infection causes ubiquitination of GRASP proteins, which**  
18 **is dependent on SidE effectors.**

19 (A) Ubiquitination assay of GRASP55-GFP purified from HEK293T cells infected with  
20 *Legionella* strains. HEK293T cells were seeded in 6-well plate and co-transfected with plasmids  
21 encoding C-terminally GFP tagged GRASP55 and FcyRII then were infected for indicated times  
22 with *Legionella* bacteria opsonized by *Legionella* antibody. Cells were lysed with IP lysis buffer  
23 and purified GRASP55 proteins were separated by SDS-PAGE followed by blotting using anti-  
24 GFP and anti-ubiquitin antibodies. (B) Ubiquitination assay of GRASP65-GFP purified from  
25 HEK293T cells infected by *Legionella* wild type or  $\Delta dupA/B$  mutant. (C) Ubiquitination assay of  
26 GRASP55-GFP purified from HEK293T cells infected with *Legionella* wild-type,  $\Delta sidEs$  or  
27  $\Delta dupA/B$  strains. (D) Ubiquitination assay of GRASP65-GFP purified from HEK293T cells  
28 infected with *Legionella* wild-type,  $\Delta sidEs$  or  $\Delta dupA/B$  strains.

29

1 **Figure 4-figure supplement 1. *Legionella* infection causes ubiquitination of**  
2 **Golgi proteins, which is dependent of SidE family proteins**

3 (A) Ubiquitination assay of GCP60-Myc purified from HEK293T cells infected with  
4 *Legionella* strains. (B) Cleavage assay of PR-ubiquitination of GRASP55 with DupA. (C)  
5 Cleavage assay of PR-ubiquitination of GRASP65 with DupA.

6  
7 **Figure 5. Identification of GRASP55 ubiquitination with mass spectrometry**

8 (A) *In vitro* reaction of GRASP55 ubiquitination by SdeA for mass spectrometry analyses. 20  $\mu$ g  
9 purified GRASP55 was incubated with SdeA and ubiquitin in the present of NAD. 10% reaction  
10 products were separated with SDS-PAGE and then stained with Coomassie blue or blotted with  
11 with antibodies against ubiquitin, GRASP55 to check the ubiquitination, the rest samples were  
12 subjected to mass spectrometry analyses. (B) Spectrum of GRASP S408-ubiquitin cross-linked  
13 peptide. (C) Validation of of ubiquitination sites in GRASP55. C-terminally HA-tagged wild-  
14 type and GRASP55 mutant were co-expressed with SdeA in HEK293T cells. After 24 h the  
15 cells were lysed for HA immunoprecipitation. Purified GRASP55-HA proteins were separated  
16 with SDS-PAGE followed by blotting using anti-HA and anti-ubiquitin antibodies. (D)  
17 Ubiquitination assay of wild type GRASP55 and mutant in cells infected with *Legionella*.

18  
19 **Figure 5-figure supplement 1. High resolution ETD spectrum of ubiquitin cross**

20 (A) High resolution ETD spectrum of ubiquitin cross linked Serine 3 of GRASP55. (B) High  
21 resolution ETD spectrum of ubiquitin cross linked Serine 408 of GRASP55. (C) High  
22 resolution ETD spectrum of ubiquitin cross linked Serine 409 of GRASP55. (D) High  
23 resolution ETD spectrum of ubiquitin cross linked Serine 449 of GRASP55.

24  
25 **Figure 6. Serine ubiquitination impairs GRASP55 function**

26 (A) Assay of the effect of PR-ubiquitination on GRASP55 dimerization *in vitro*. GRASP55-GFP  
27 purified from HEK293T cells were modified *in vitro* using SdeA and ubiquitin in the presence of  
28 NAD<sup>+</sup>, ubiquitinated GRASP55-GFP was then incubated with purified His-tagged GRASP55.  
29 Interaction between differently tagged GRASP55 proteins were analyzed with co-  
30 immunoprecipitation followed with western blotting. (B) Assay of the effect of PR-ubiquitination

1 on GRASP55 dimerization *in vivo*. HA-tagged GRASP55 and GFP-tagged GRASP55 serine  
2 mutant were co-expressed with SdeA in HEK293T cells. Protein interaction between differently  
3 tagged GRASP55 were analyzed with co-IP and western blotting. (C) Confocal images showing  
4 that GRASP55 mutant is resistant to Golgi fragmentation caused by SdeA expression. Golgi  
5 areas of more than 60 cells from 3 replicates of each condition were measured with ImageJ  
6 software. (D) Data are shown as means  $\pm$  SEM of more than 70 cells taken from three  
7 independent experiments. Data were analyzed with unpaired t test, \*\*\*P<0.001.

8

### 9 **Figure 6-figure supplement 1**

10 (A) Confocal images showing exogenously expressed wild-type GRASP55-HA and mutant  
11 rescue Golgi fragmentation caused by GRASP55/GRASP65 knockout. (B) Western blotting of  
12 cell lysates from wild-type and G55/G65 knockout HeLa cell lines. Knockout of G55 and G65  
13 were validated with antibodies against G55, G65 respectively.

14

### 15 **Figure 7. *Legionella* does not recruit fragmented Golgi**

16 (A) Confocal images showing *Legionella* recruits overexpressed Golgi protein GRASP55.  
17 HEK293T cells transfected with plasmids encoding FCyRII and GFP-tagged GRASP55 were  
18 infected with indicated *Legionella* strains. Cells were washed 3 times with PBS after 2 hours  
19 infection to remove un-endocytosed bacteria, then fixed with 4% PFA and stained with antibody  
20 against *Legionella*. (B) Confocal images showing *Legionella* recruits overexpressed Golgi  
21 marker GalT. (C) Confocal images showing *Legionella* does not recruit endogenous cis-Golgi  
22 protein GM130 or trans-Golgi protein TGN46. A549 cells were infected with *Legionella*  
23 expressing dsRed and stained with antibodies against GM130 and TGN46. (D) Confocal images  
24 showing *Legionella* does not recruit endogenous cis-Golgi protein GRASP65 or trans-Golgi  
25 protein GRASP55. A549 cells were infected with *Legionella* expressing dsRed and stained with  
26 antibodies against GRASP65 and GRASP55.

27

### 28 **Figure 8. SdeA induced serine ubiquitination inhibits VSVG trafficking through** 29 **Golgi membranes.**

30 (A) Confocal images showing the effect of SidE family effectors on VSVG trafficking during

1 *Legionella* infection. **(B)** Quantitative analysis of the effect of SidE family effectors on VSVG  
2 trafficking during *Legionella* infection. Co-localization between VSVG and GM130 was shown  
3 as Manders coefficient. Data represents 30 cells taken from 3 independent experiments. White  
4 boxes indicate insets which are split into red, green, blue channels and displayed on the right  
5 side of the image. Center lines show the medians; box limits indicate the 25th and 75th  
6 percentiles as determined by R software; whiskers extend 1.5 times the interquartile range from  
7 the 25th and 75th percentiles, outliers are represented by dots; data points are plotted as circles.  
8 **(C)** Western blotting analysis of the effect of SidE family effectors on VSVG trafficking during  
9 *Legionella* infection using EndoH. Upper bands indicate the EndoH resistant form and lower  
10 bands indicate the EndoH sensitive form of VSVG. **(D)** Quantification of **(C)** to indicate the effect  
11 of *Legionella* infection on the conversion of EndoH sensitive form to resistant form of VSVG  
12 upon 32 °C incubation. Data were analyzed with unpaired t test, \*\*\*P<0.001, \*\*P<0.01, \*P<0.05.  
13 **(E)** ELISA assay of TNF $\alpha$  secreted from THP-1 cells infected with *Legionella* strains. Data are  
14 shown as means  $\pm$  SEM of cytokine values of three independent experiments. Data were  
15 analyzed with unpaired t test, \*\*\*P<0.001, \*\*P<0.01, \*P<0.05.

16

### 17 **Figure 8-figure supplement 1. Golgi dynamics in cells expressing SdeA**

18 **(A)** FRAP (fluorescence recovery after photobleaching) experiment showing Golgi dynamics in  
19 SdeA expressing cells. Golgi in live control or cells expressing SdeA **(B)** were photobleached  
20 at ROIs followed by measurement of fluorescence of ROIs over time. **(C)** Recovery curve of  
21 fluorescence after photobleaching of marked ROIs.

22

### 23 **Figure 8-figure supplement 2. SdeA expression in cells impairs protein** 24 **trafficking**

25 **(A)** Analysis of VSVG trafficking in HEK293T cells expressing SdeA. Cells grown in 40 °C were  
26 moved to 32 °C for indicated time points. **(B)** Analysis of VSVG trafficking in HEK293T cells  
27 expressing SdeA using EndoH. Cells grown in 40 °C were moved to 32 °C for indicated time  
28 points. Cell lysates were probed with GFP antibody. **(C)** Analysis of the effect of SdeA  
29 expression on electrophoretic mobility of the Golgi protein LAMP1. Lysates from cells  
30 expressing SdeA WT or SdeA EEAA mutant were probed with LAMP1 antibody.

Figure 1. SdeA partially localizes to the Golgi

**A**

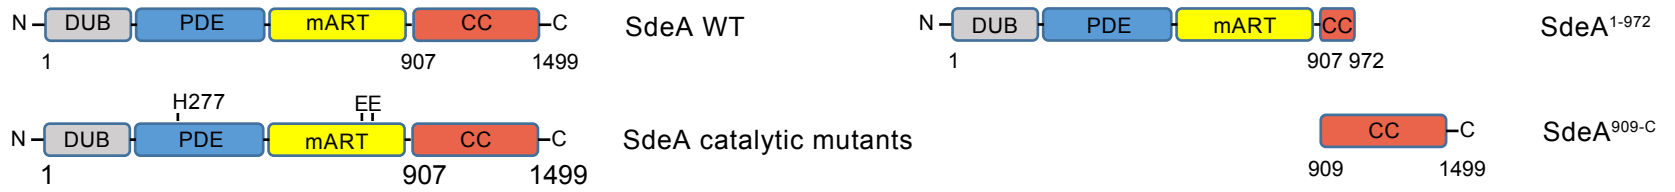

**B**

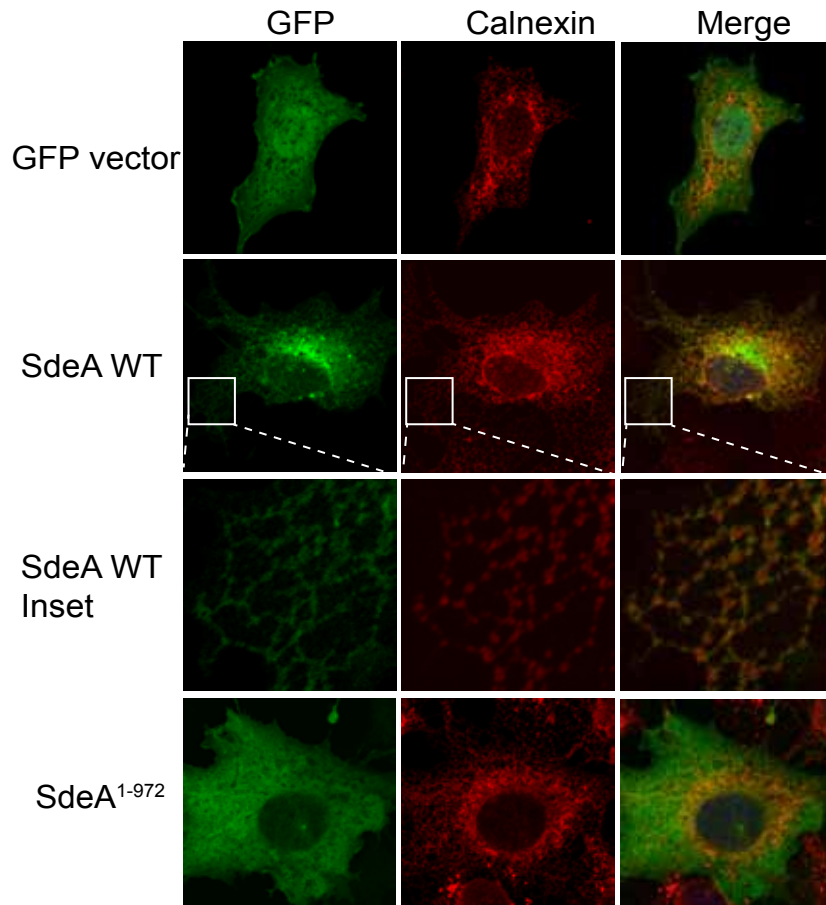

**C**

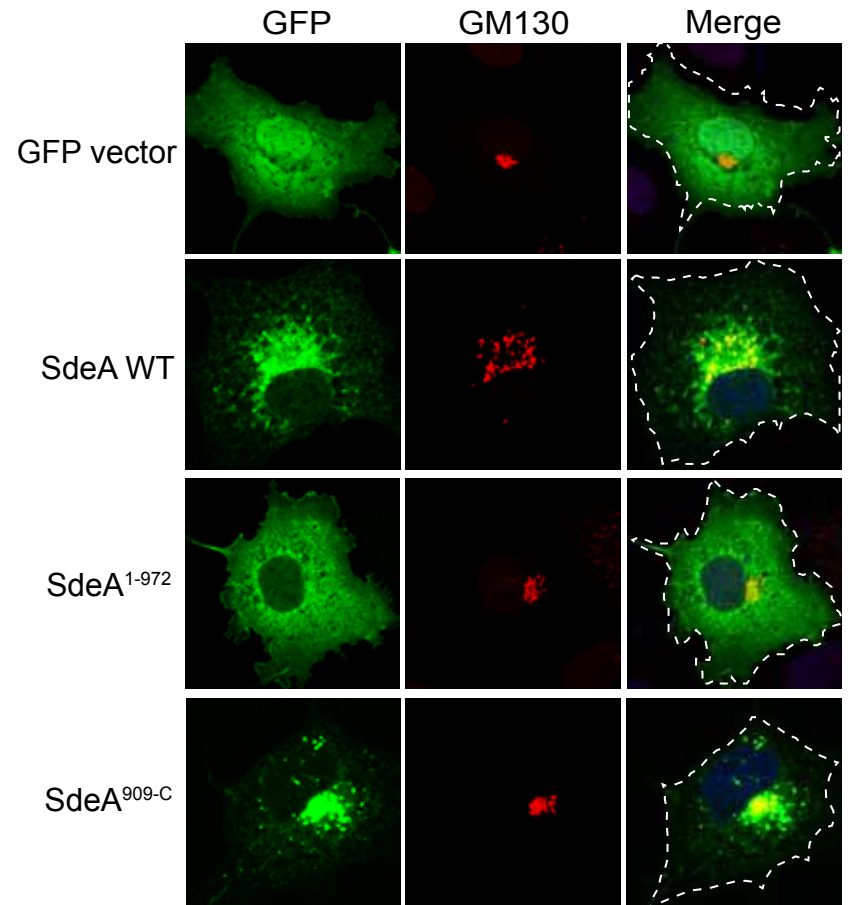



**Figure 2. *Legionella* effector SdeA mediates Golgi structure disruption**  
 bioRxiv preprint doi: <https://doi.org/10.1101/2020.07.27.223842>; this version posted November 19, 2020. The copyright holder for this preprint (which was not certified by peer review) is the author/funder. All rights reserved. No reuse allowed without permission.

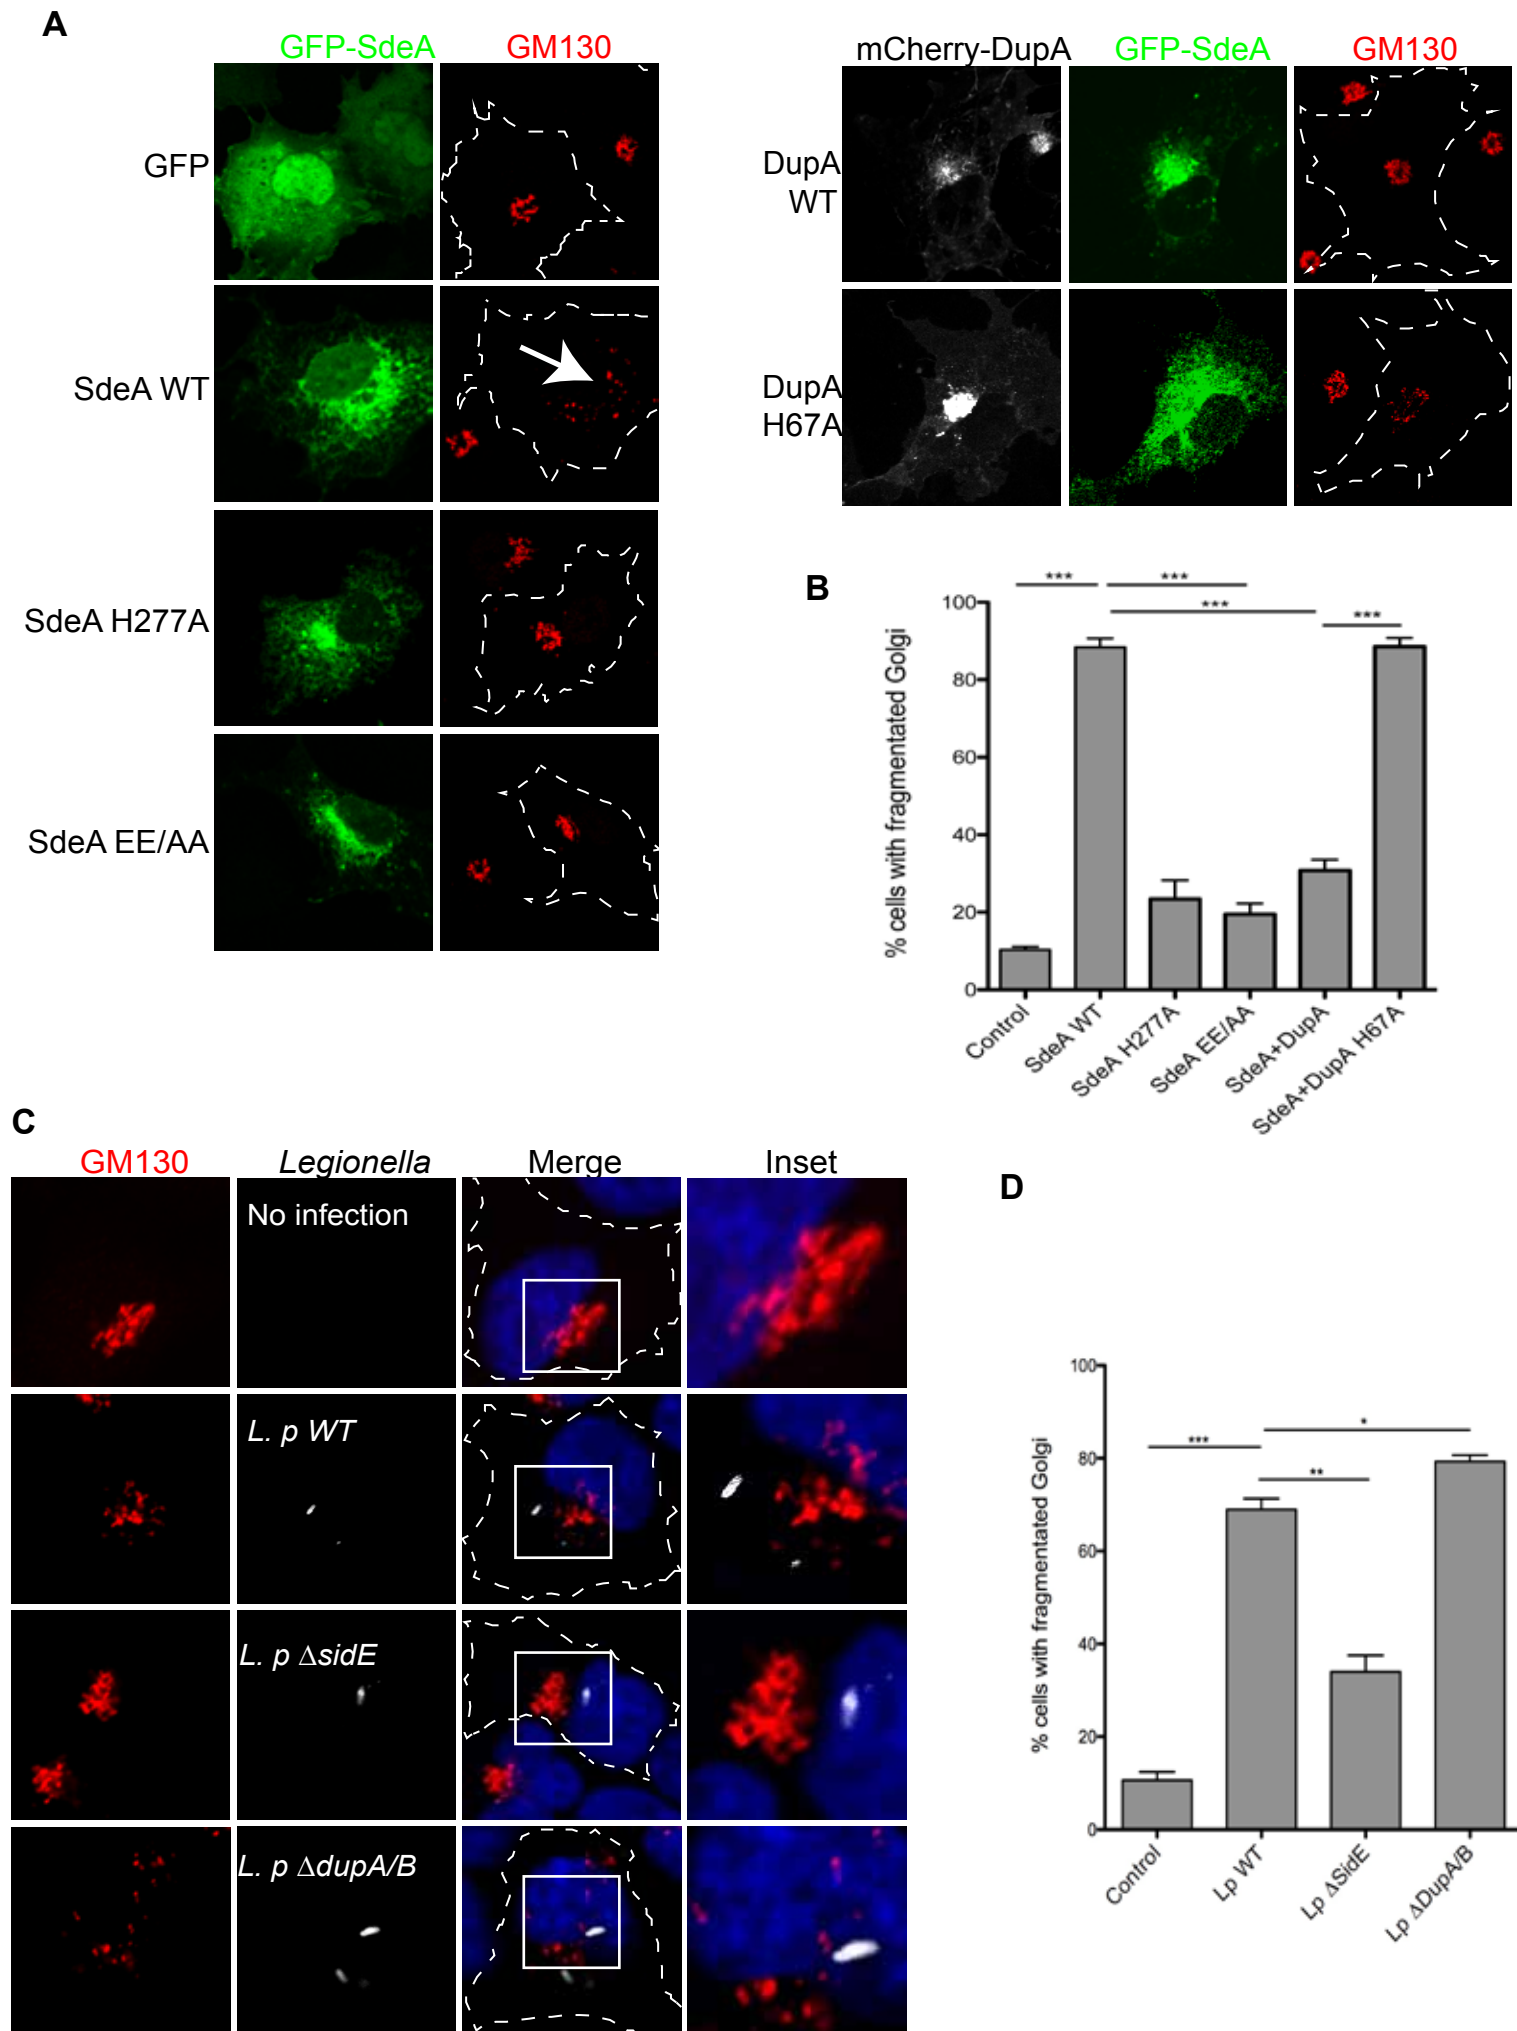



Figure 2-figure supplement 1. *Legionella* effector SdeA mediates Golgi structure disruption

**A**

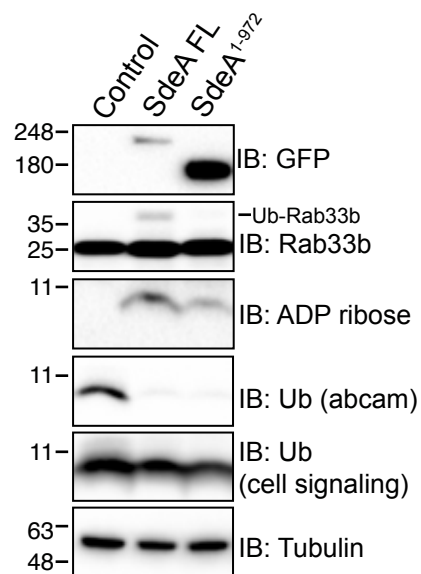

**B**

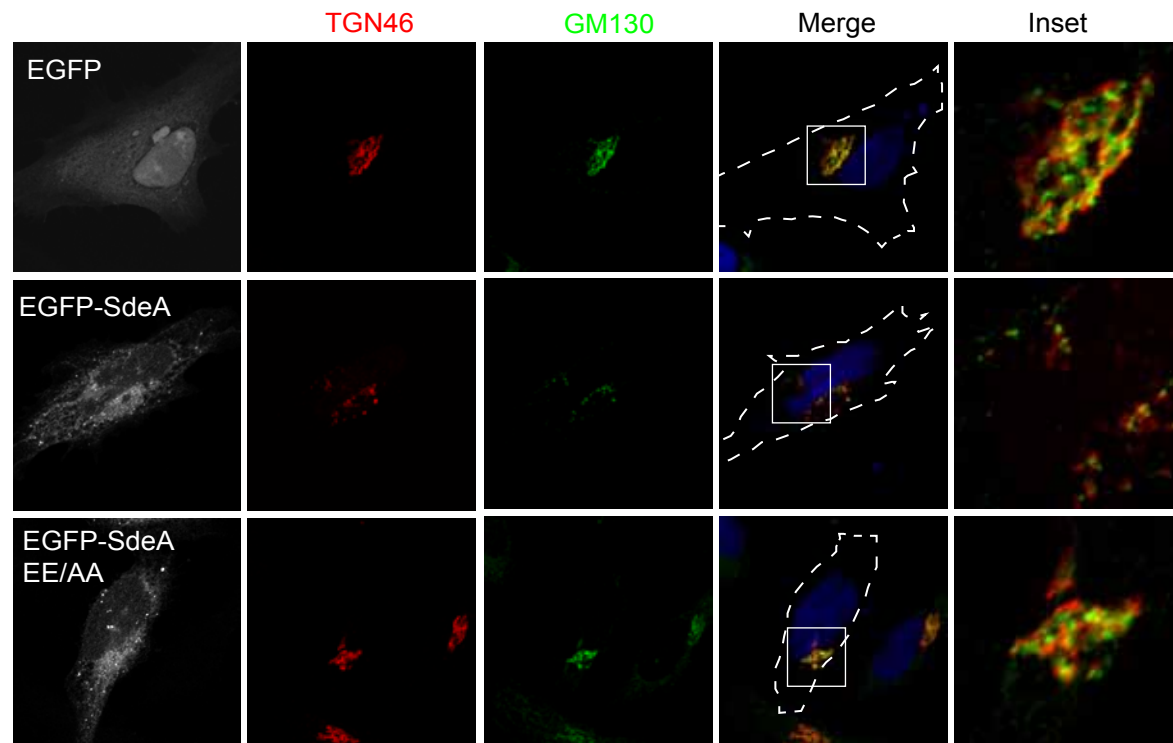

**C**

untransfected

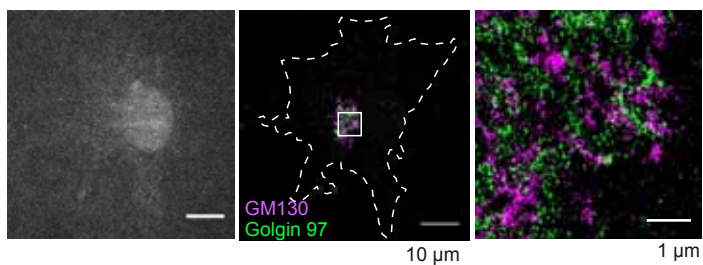

transfected with SdeA

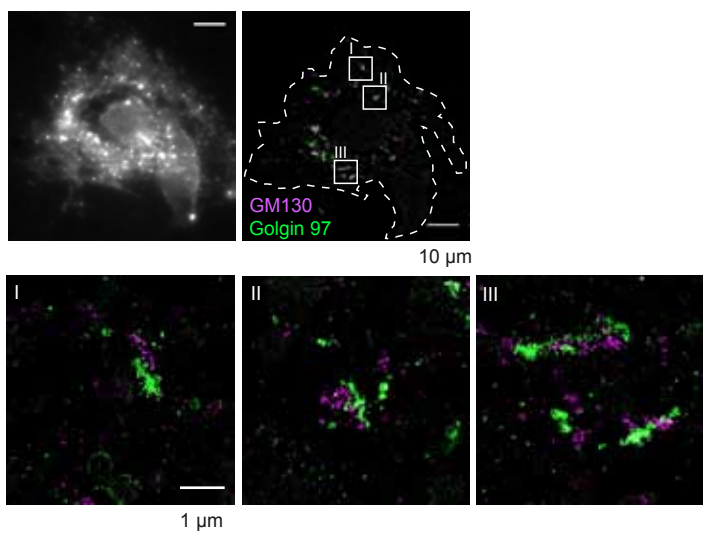

**D**

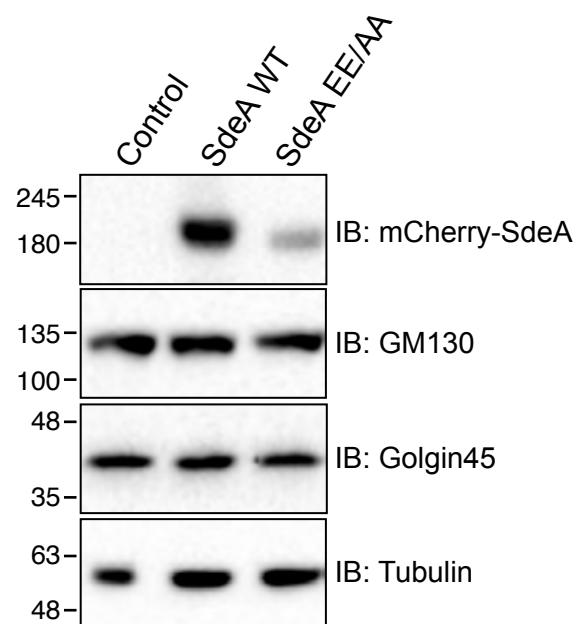

Figure 3. SdeA ubiquitinates Golgi tethering factor GRASP proteins

**A**

|                               | Protein names  | dDup12/dSidE |
|-------------------------------|----------------|--------------|
|                               | STIM1          | 5,73         |
|                               | FAM134C        | 4,86         |
|                               | VCP            | 4,59         |
| <b>ER proteins</b>            | RTN4           | 4,41         |
|                               | SNAP23         | 4,29         |
|                               | TEX264         | 3,64         |
|                               | LNP            | 2,38         |
| <b>Golgi related proteins</b> | <b>GRASP55</b> | <b>5,83</b>  |
|                               | TMED8          | 4,72         |
|                               | GCP60          | 2,69         |
|                               | YIF1A          | 2,44         |
|                               | RAB33B         | 3,09         |
|                               | SNX5           | 2,76         |

**C**

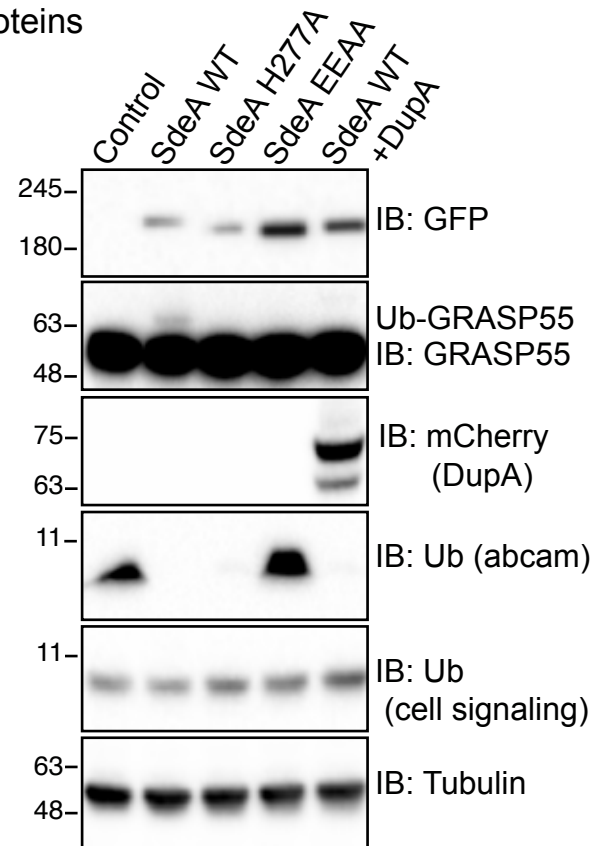

**B**

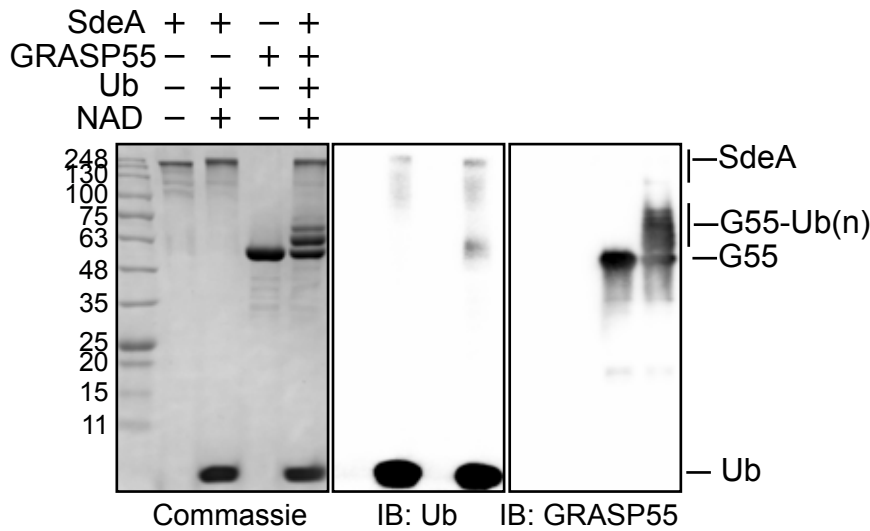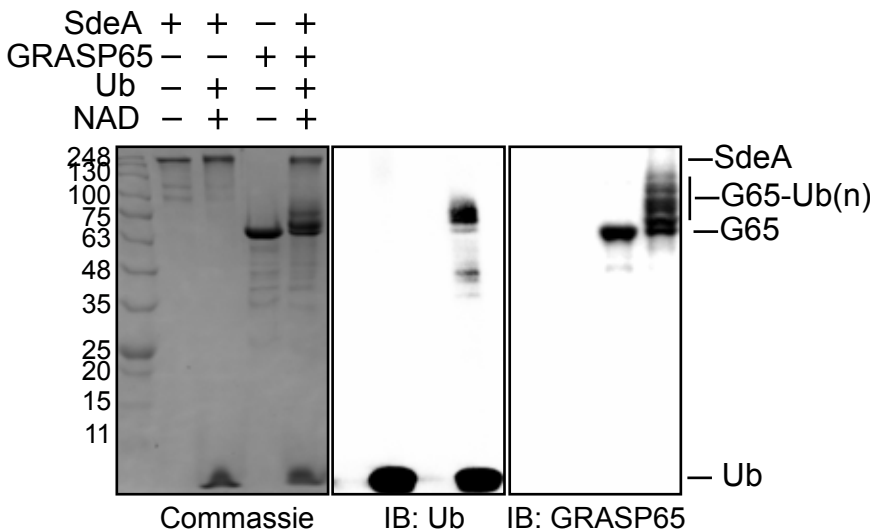

**D**

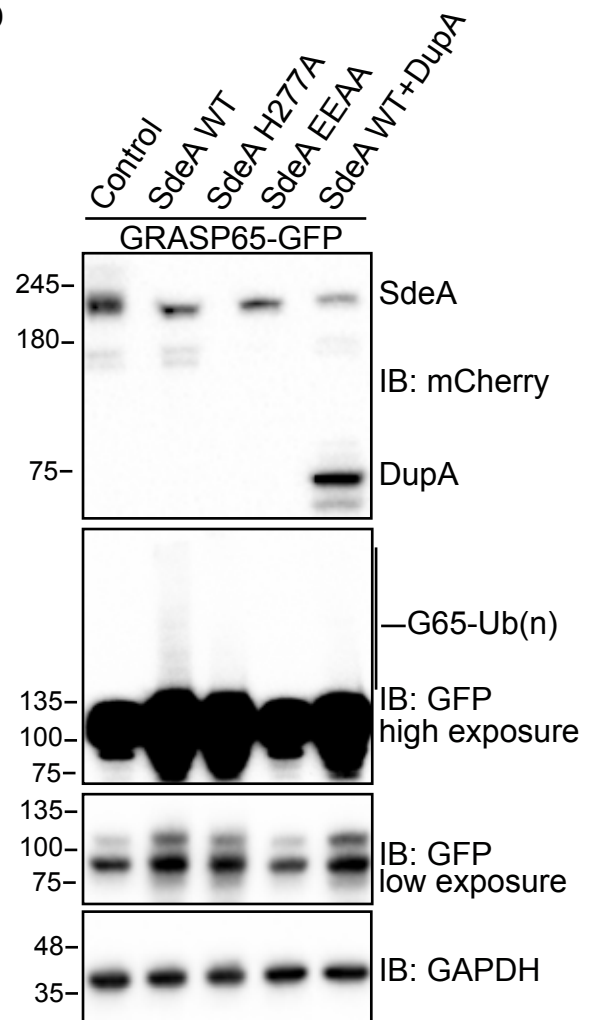

Figure 3-figure supplement 1. SdeA ubiquitinates Golgi proteins

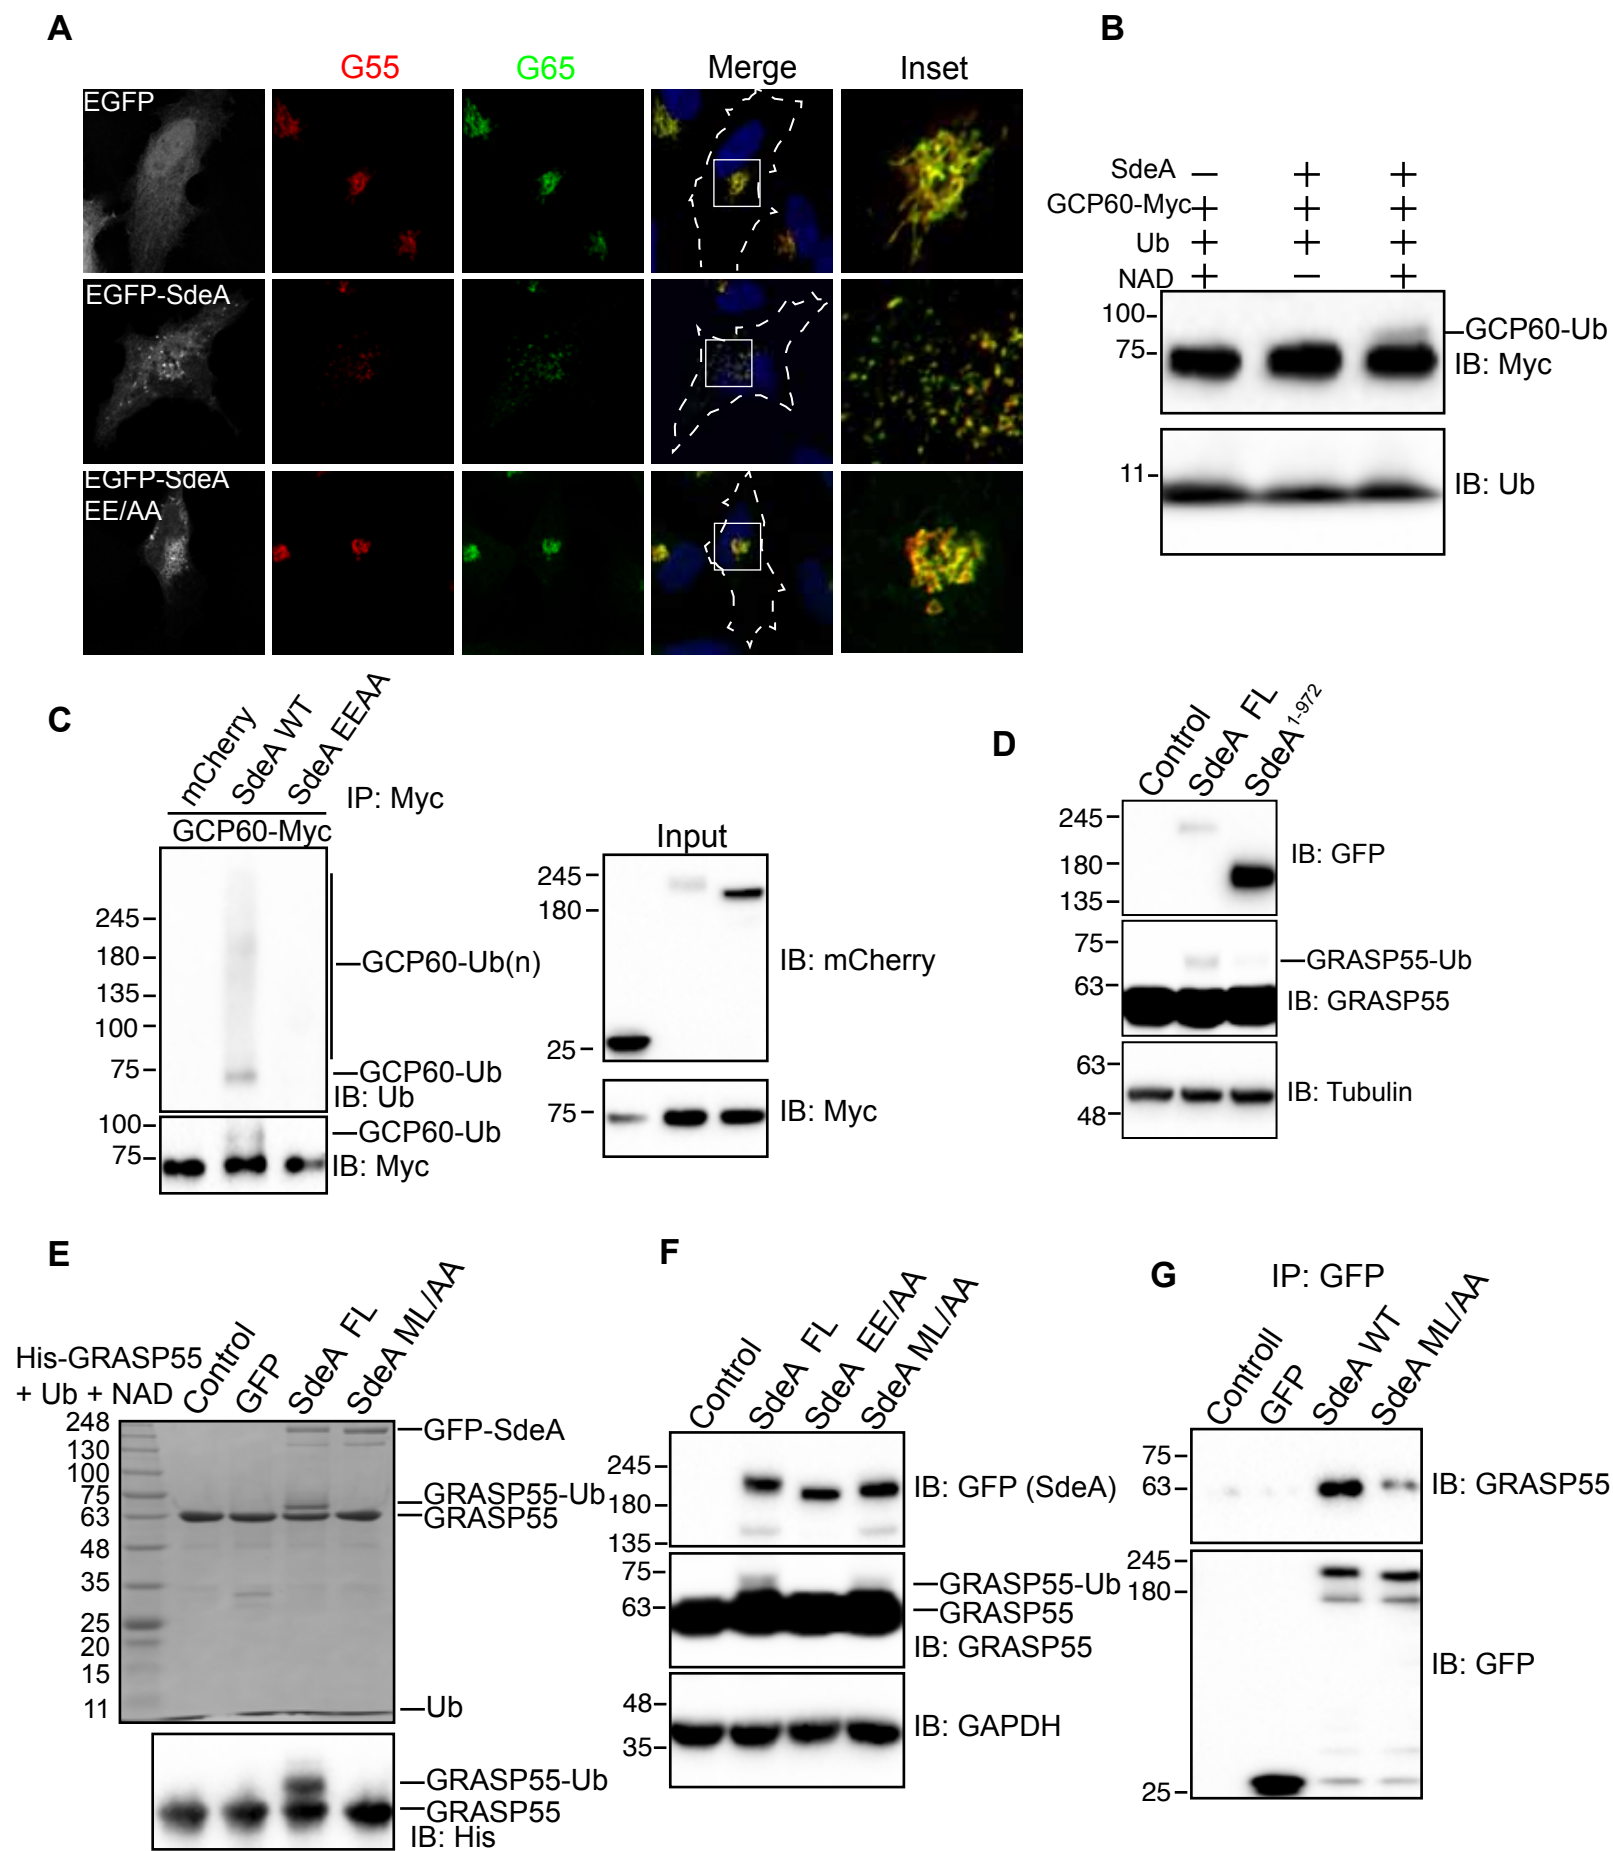

Figure 4. *Legionella* infection causes SidEs-catalyzed ubiquitination of GRASP proteins

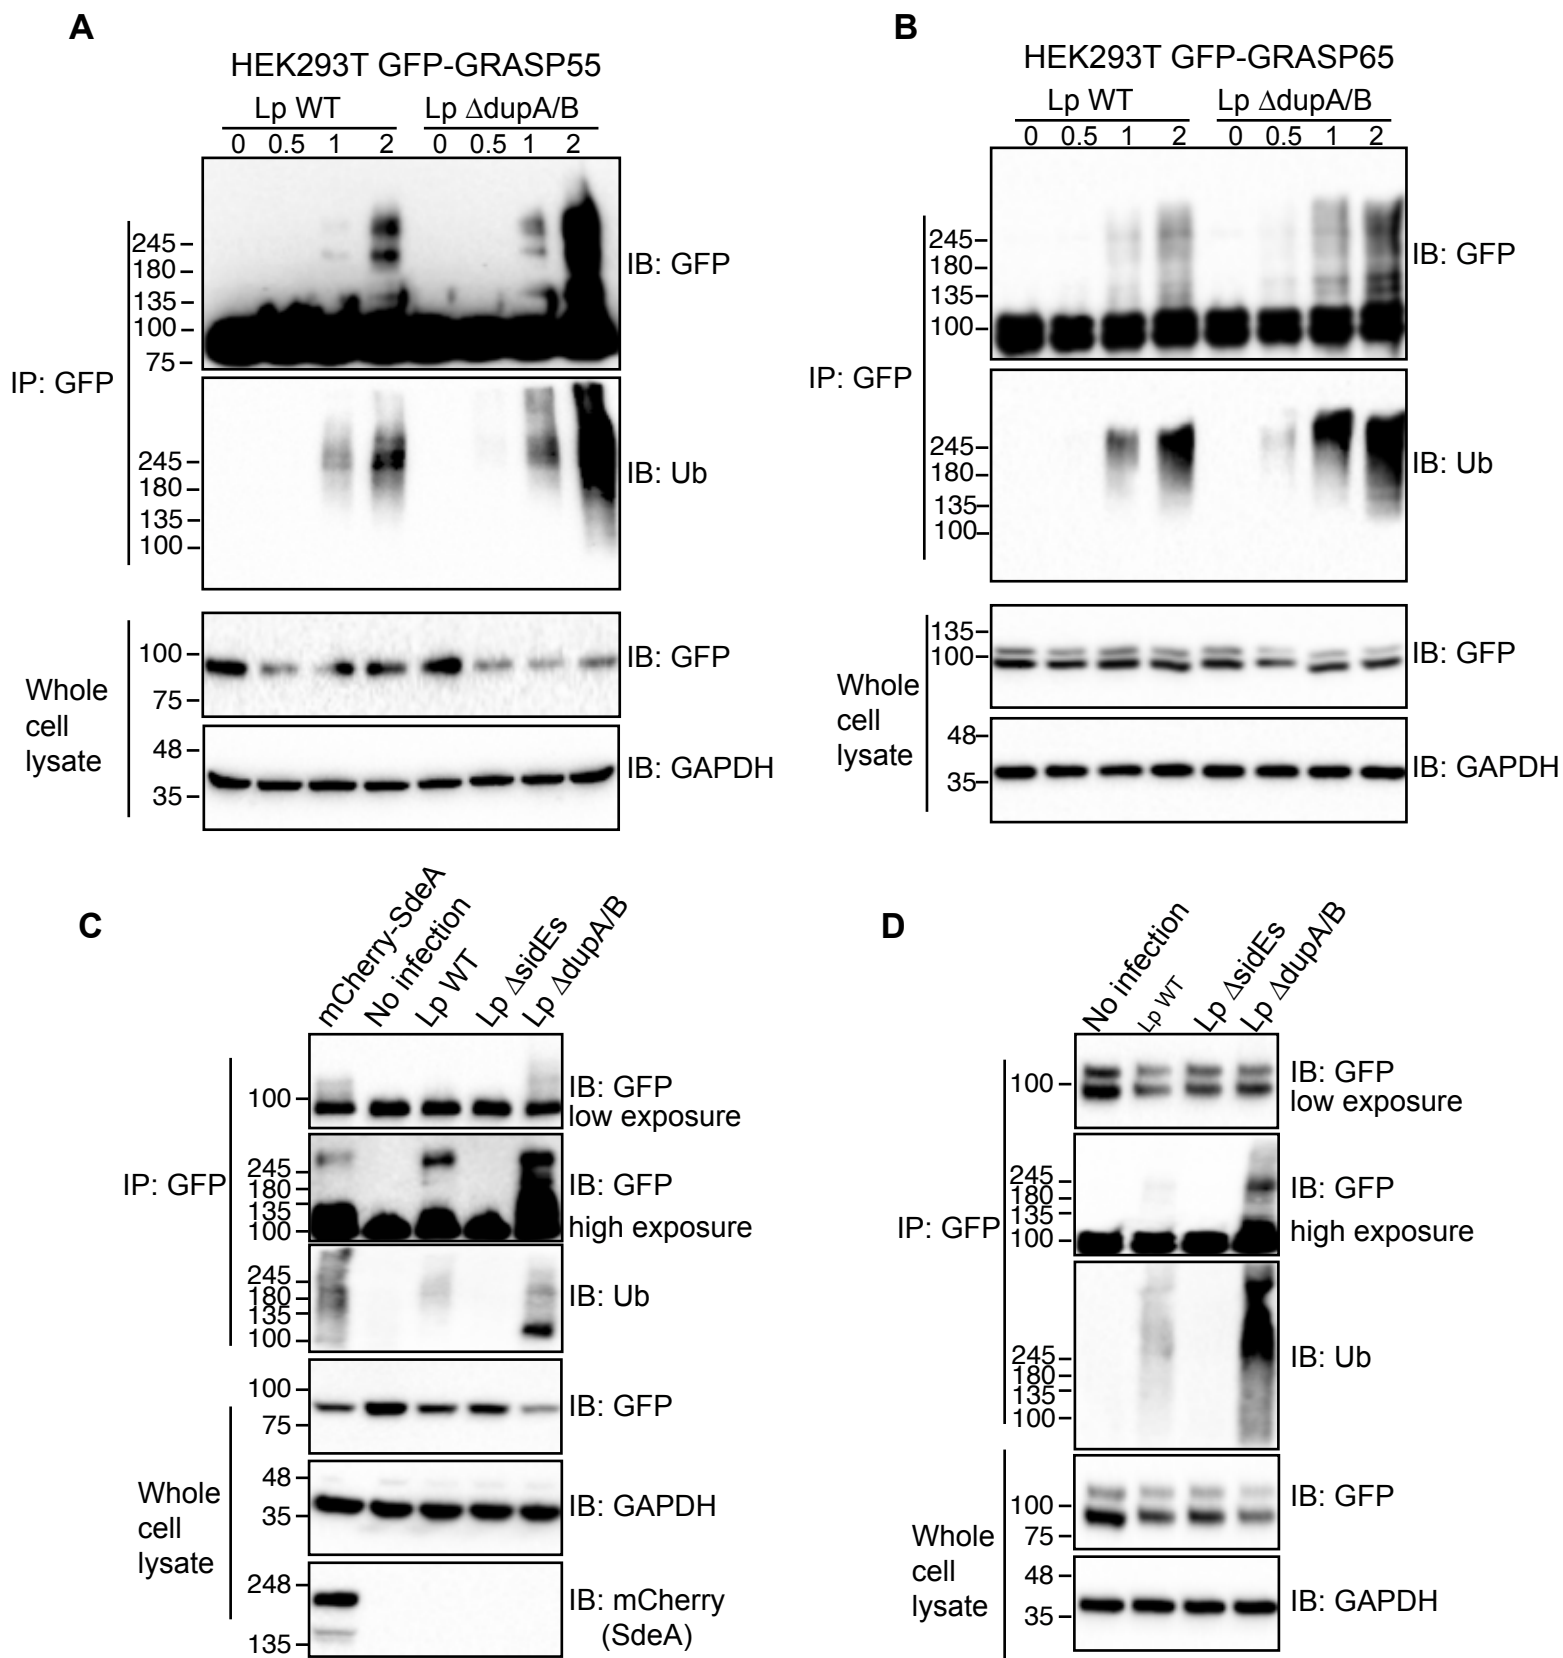

Figure 4-figure supplement 1. *Legionella* infection causes SidEs-catalyzed ubiquitination of GRASP proteins

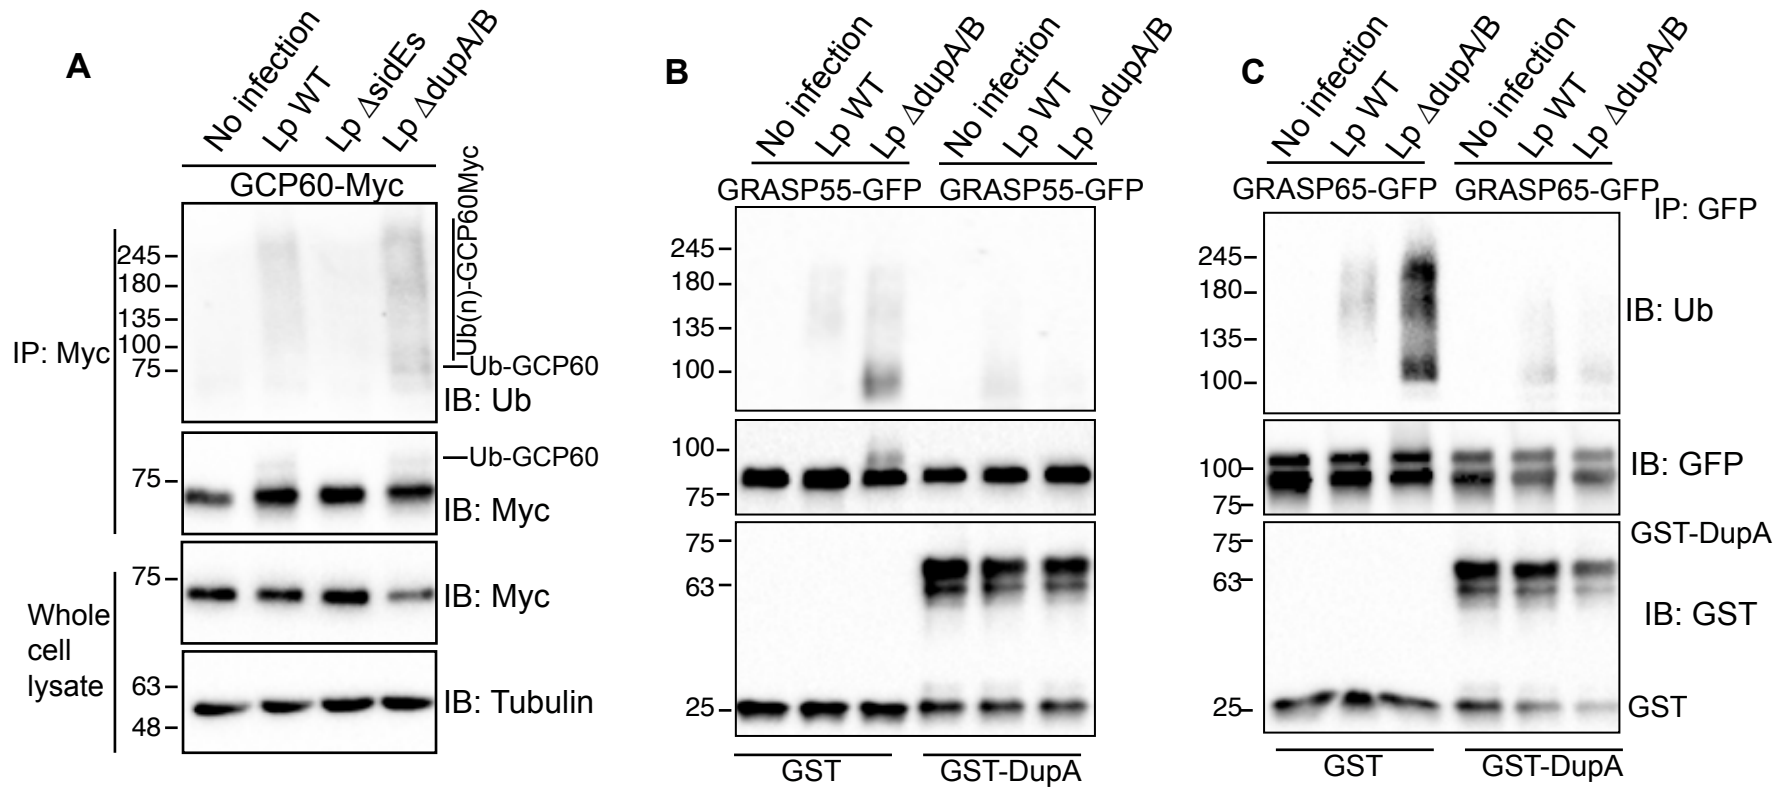

Figure 5. Identification of GRASP55 ubiquitination sites

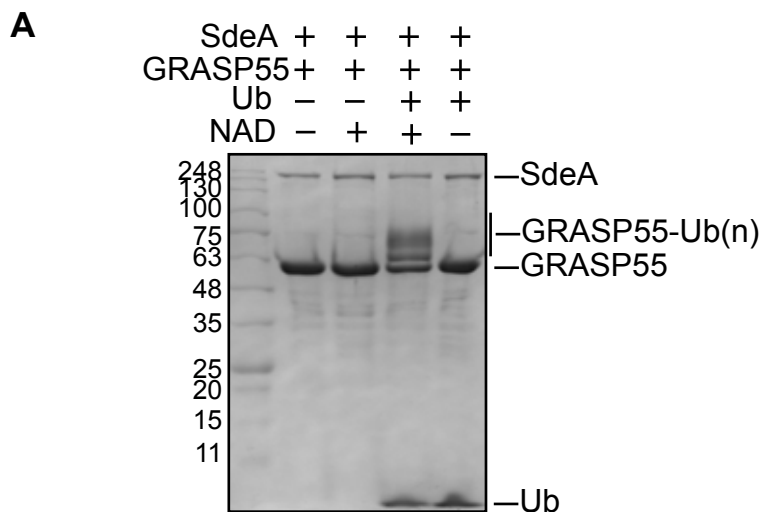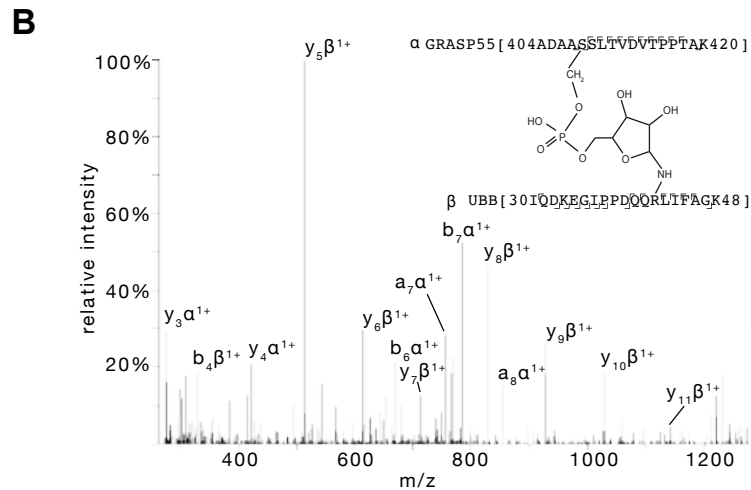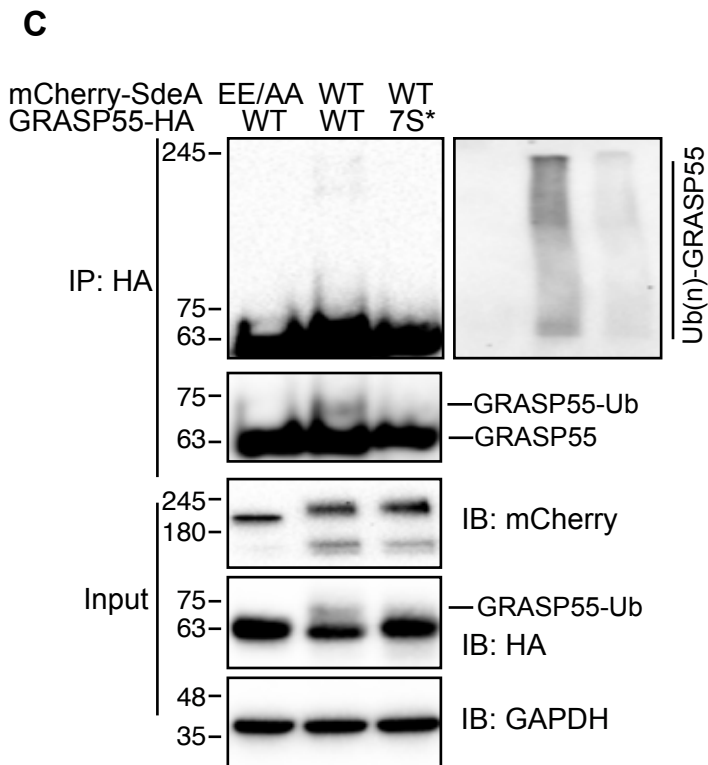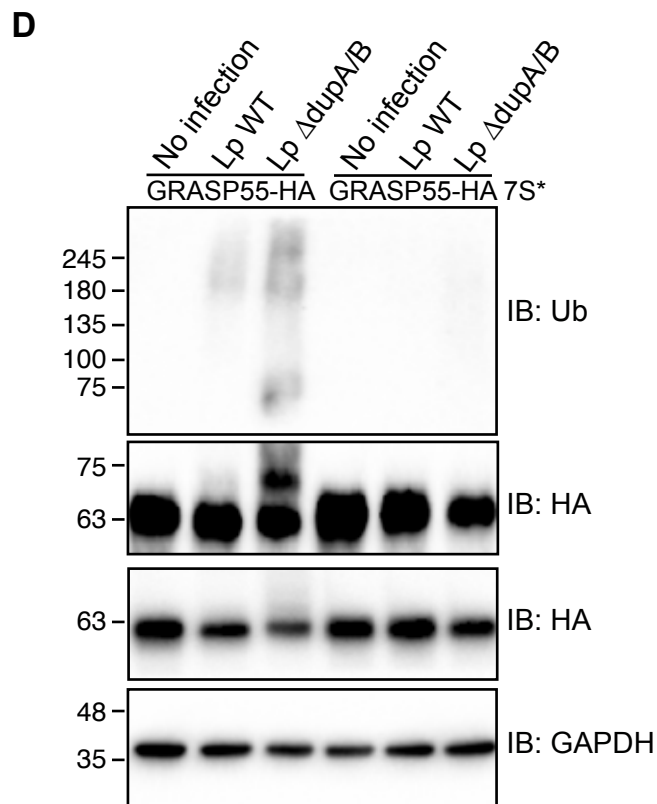



Figure 5-figure supplement 1. Identification of GRASP55 ubiquitination sites

A

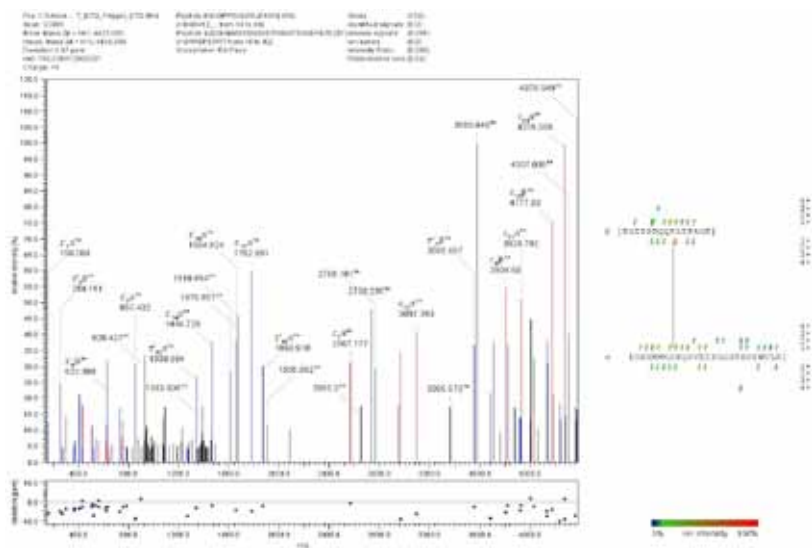

B

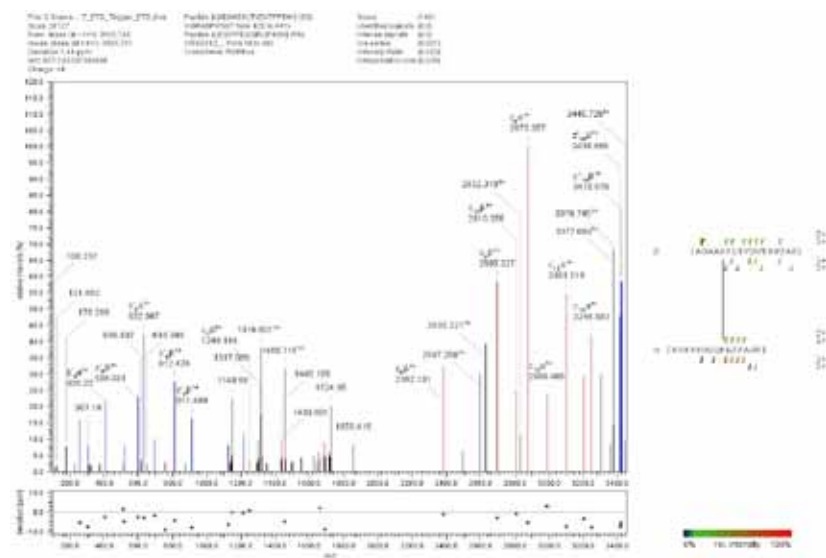

C

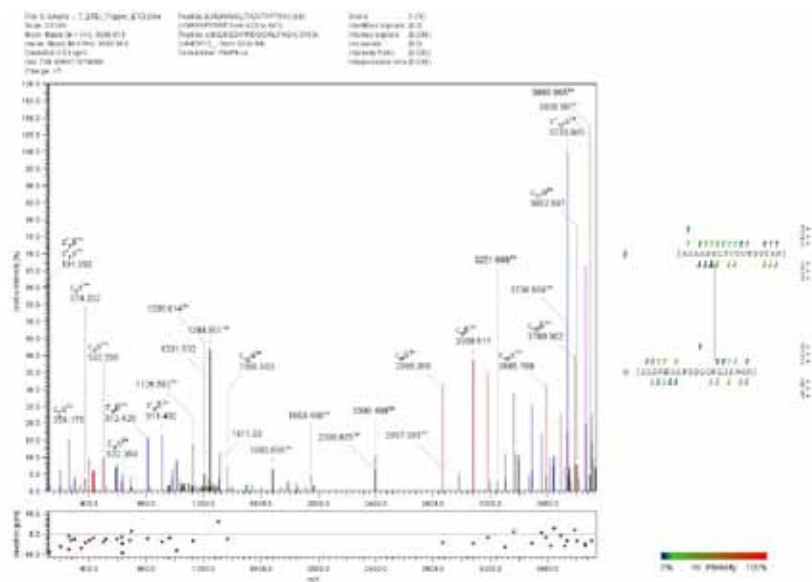

D

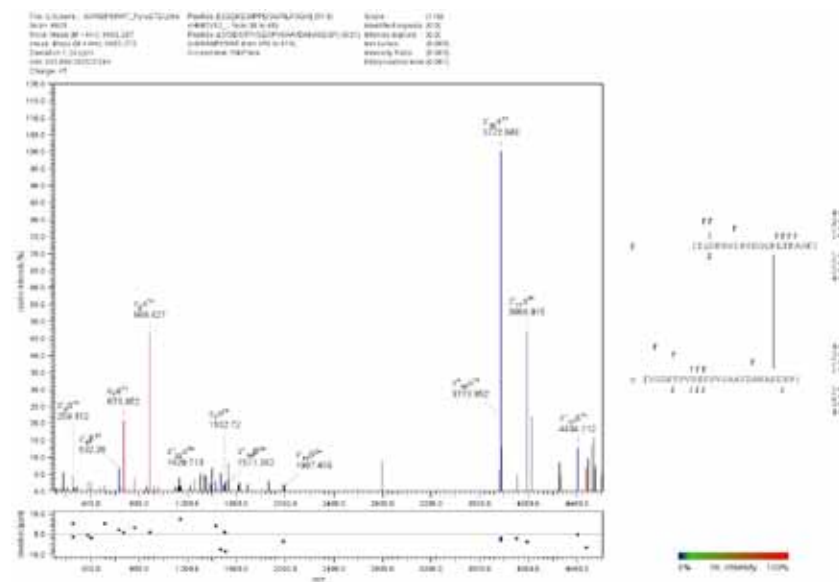

Figure 6. Serine ubiquitination impairs GRASP55 function

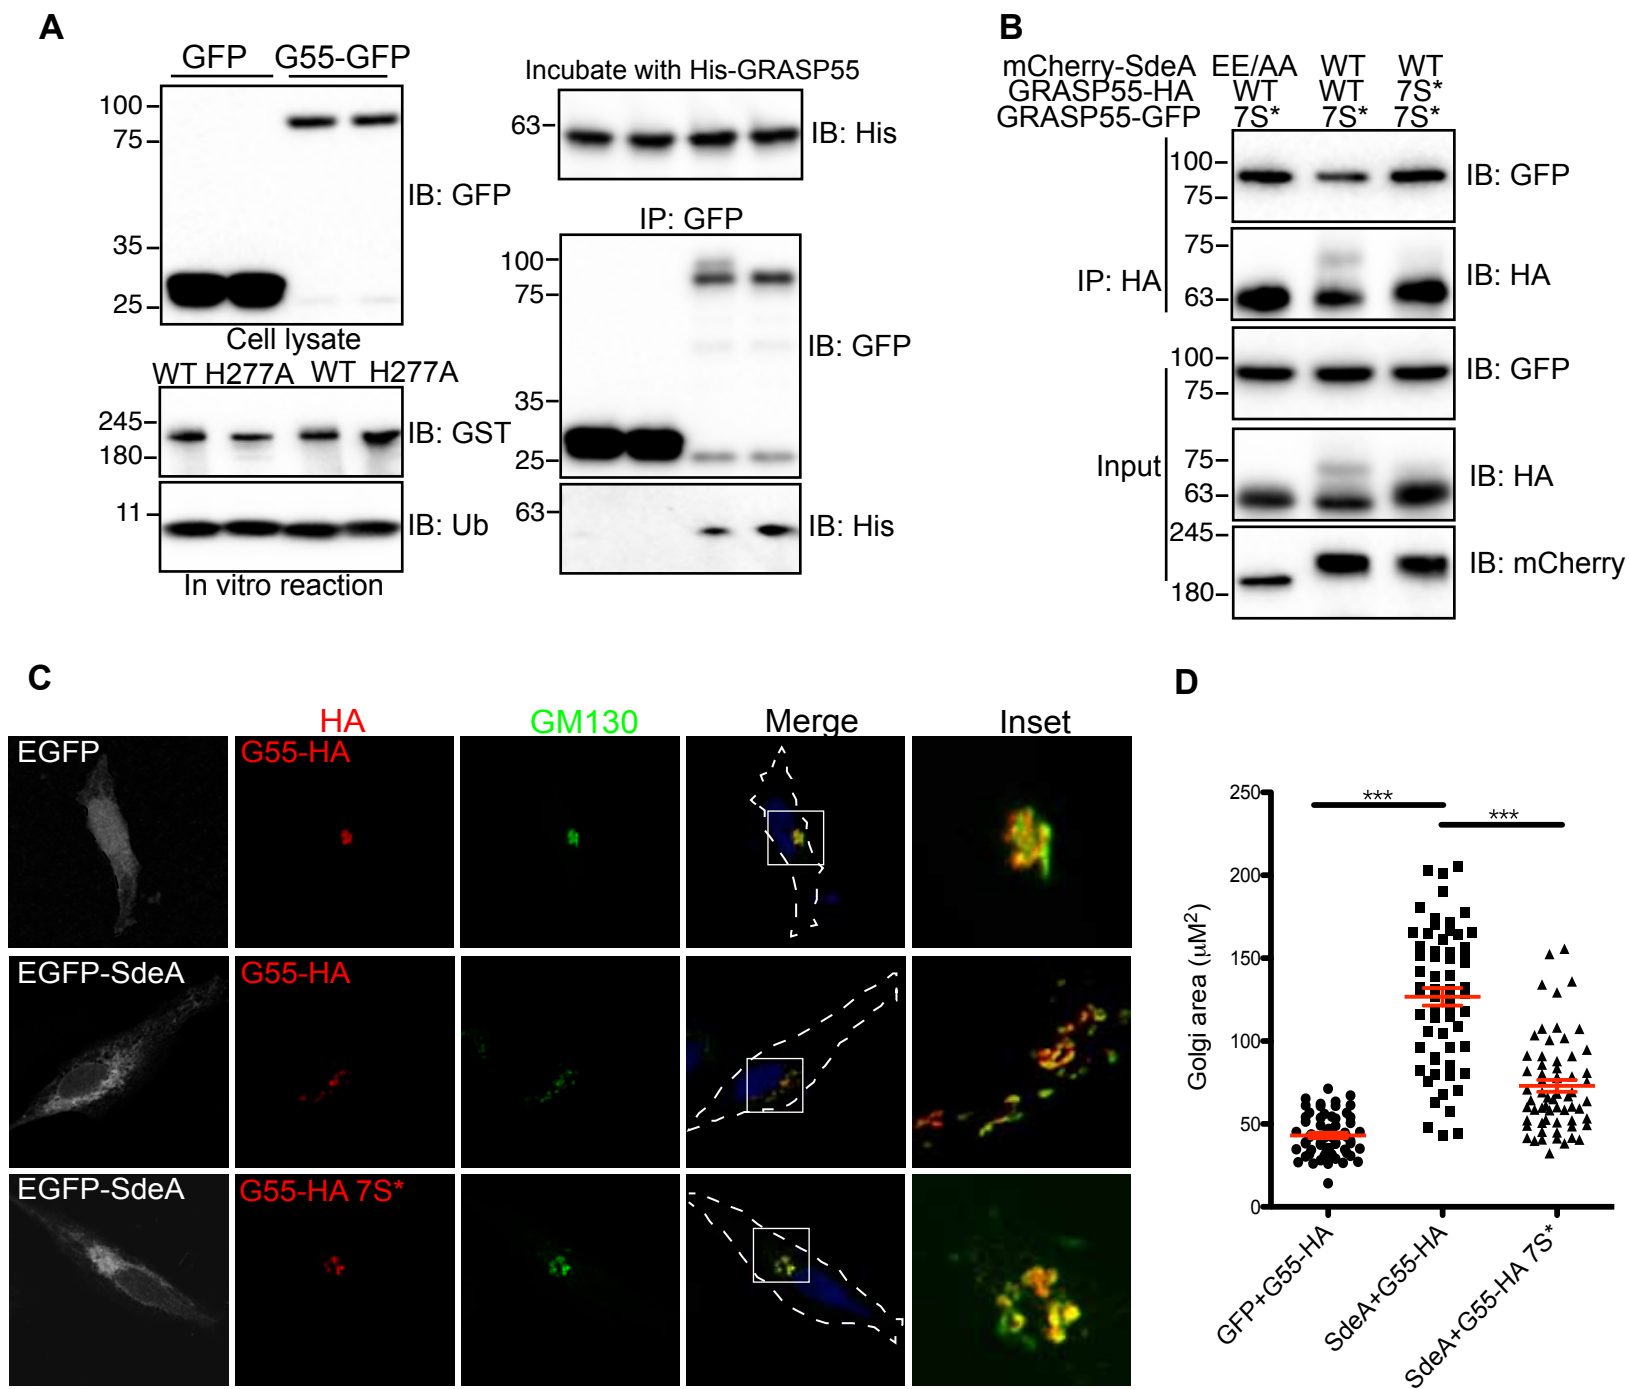



Figure 6-figure supplement 1. GRASP55 mutant rescues Golgi fragmentation of GRASP55/65 KO cells

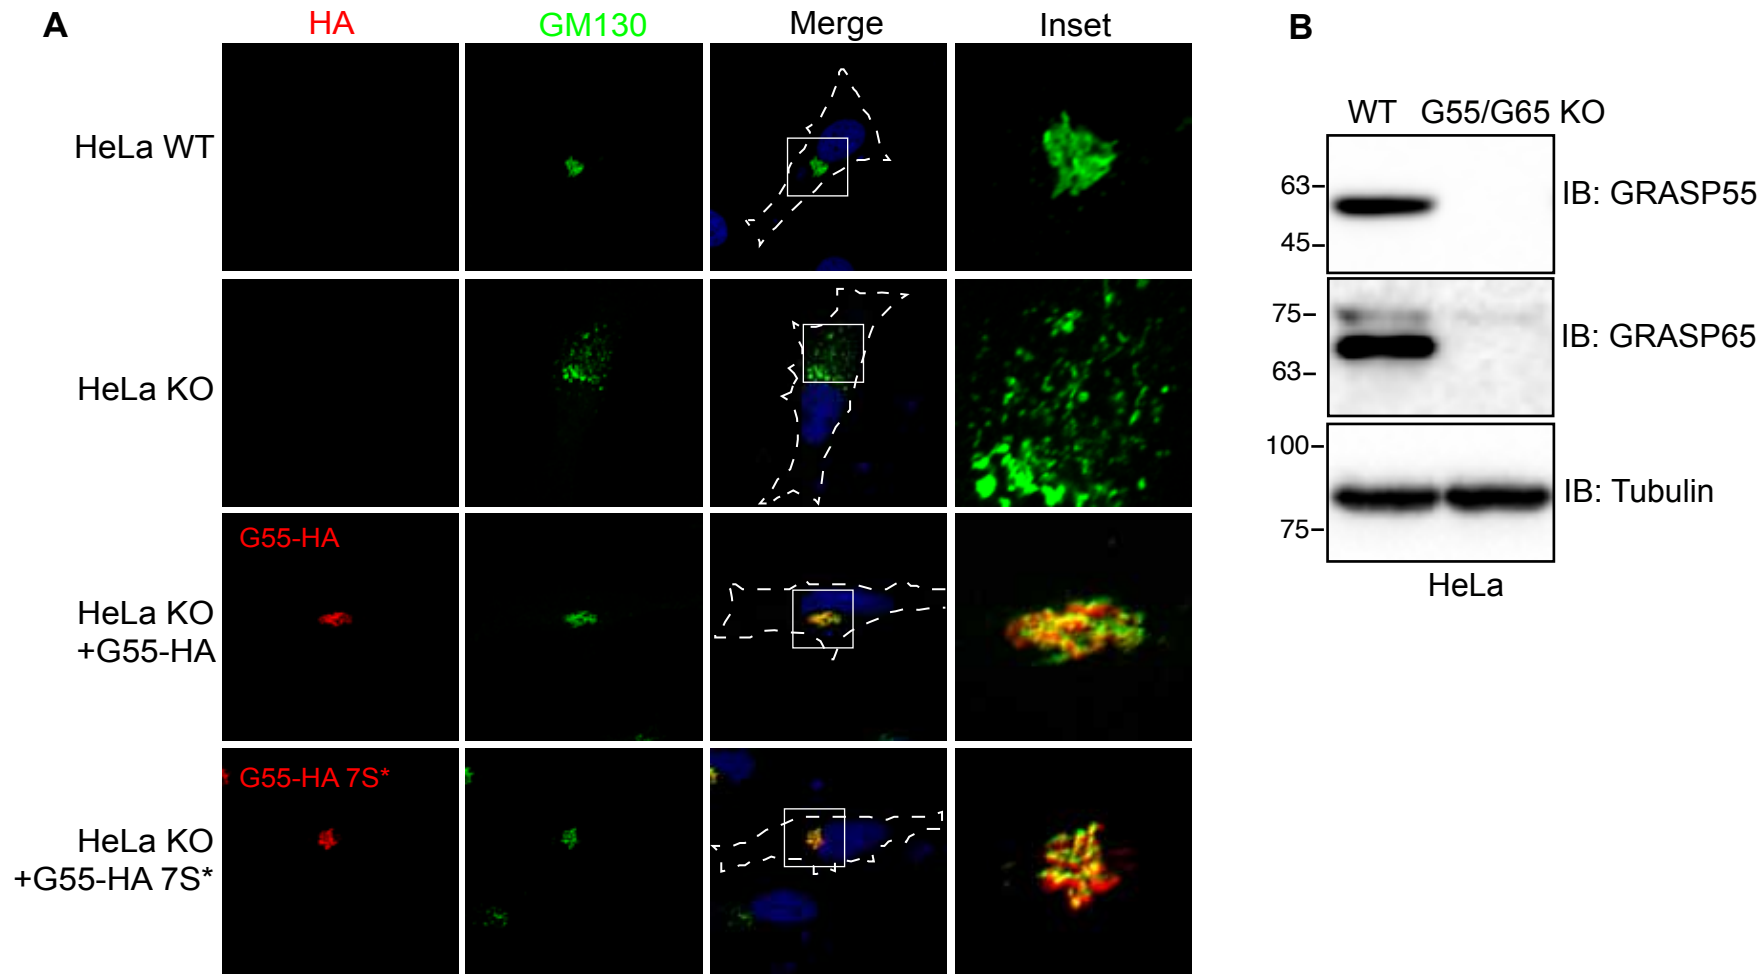

Figure 7. *Legionella* does not recruit dispersed Golgi

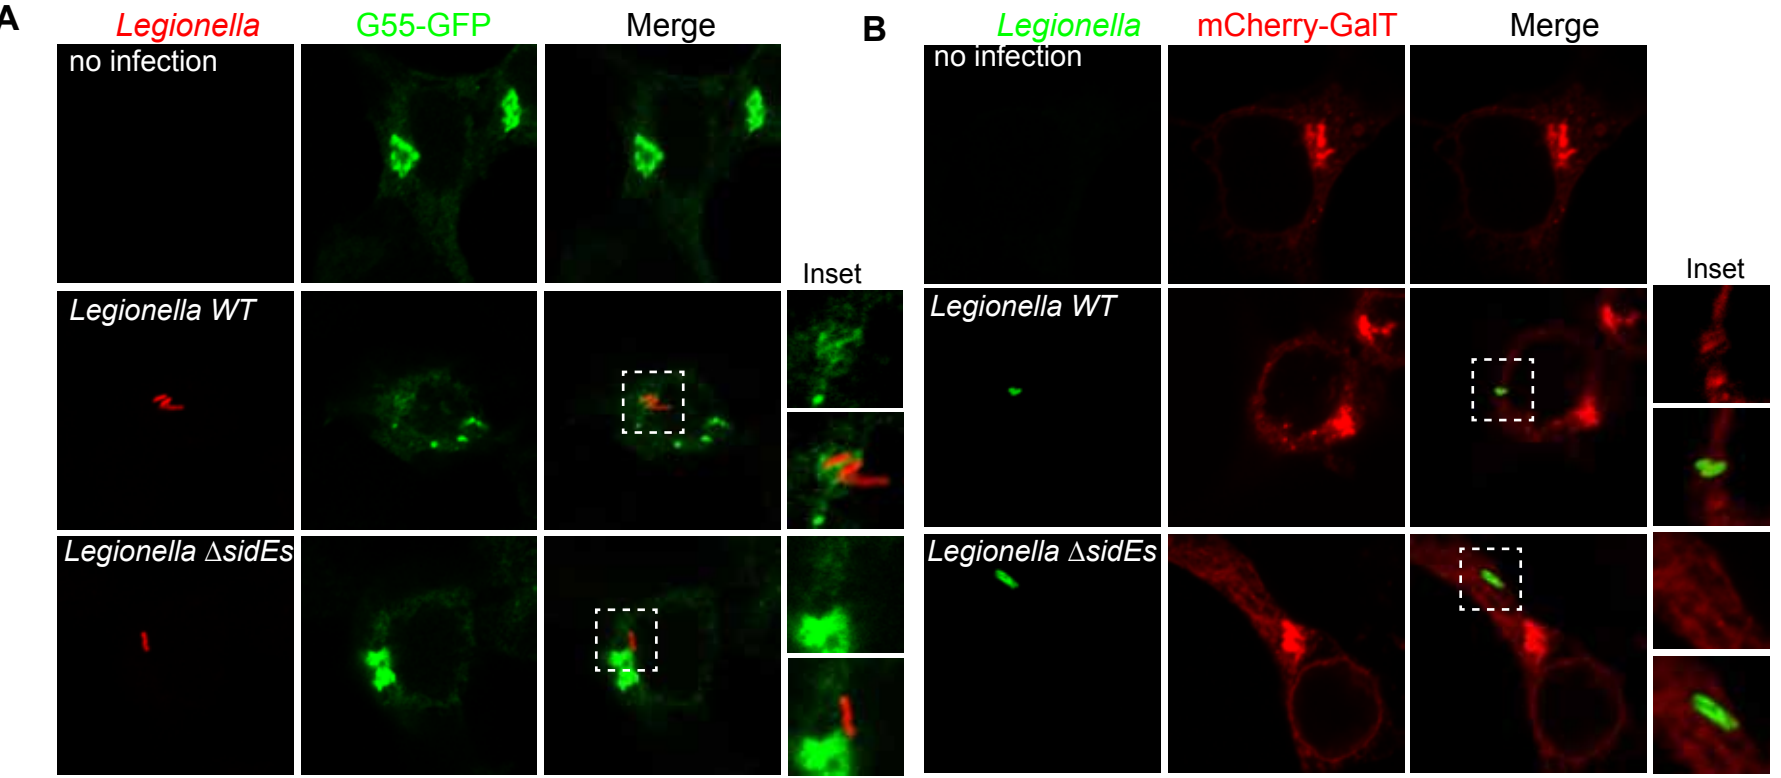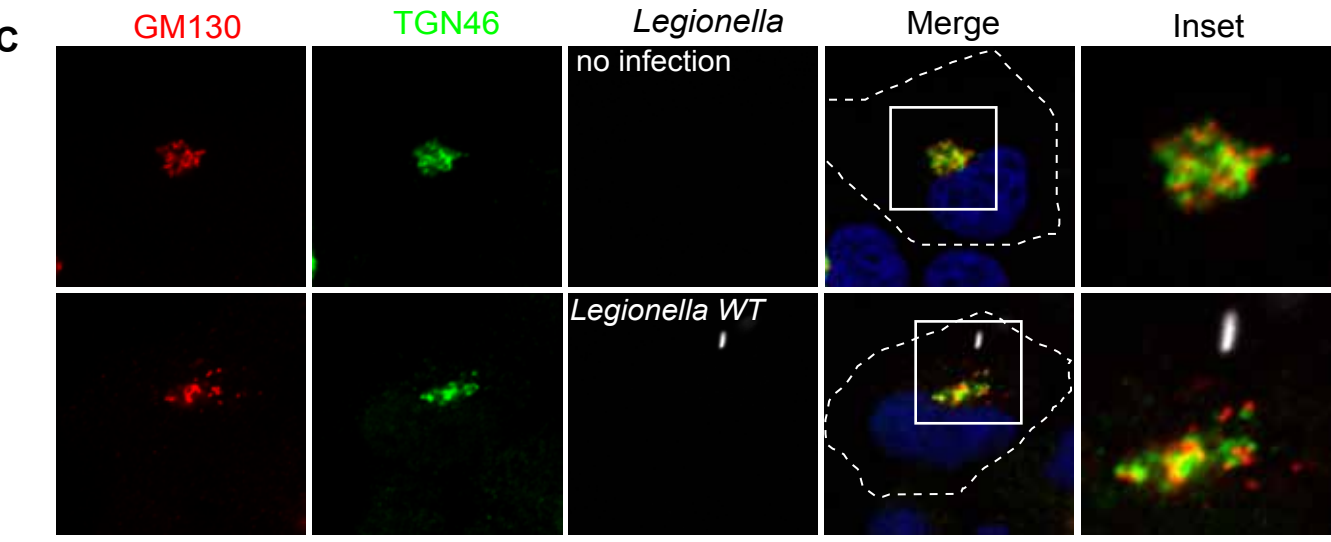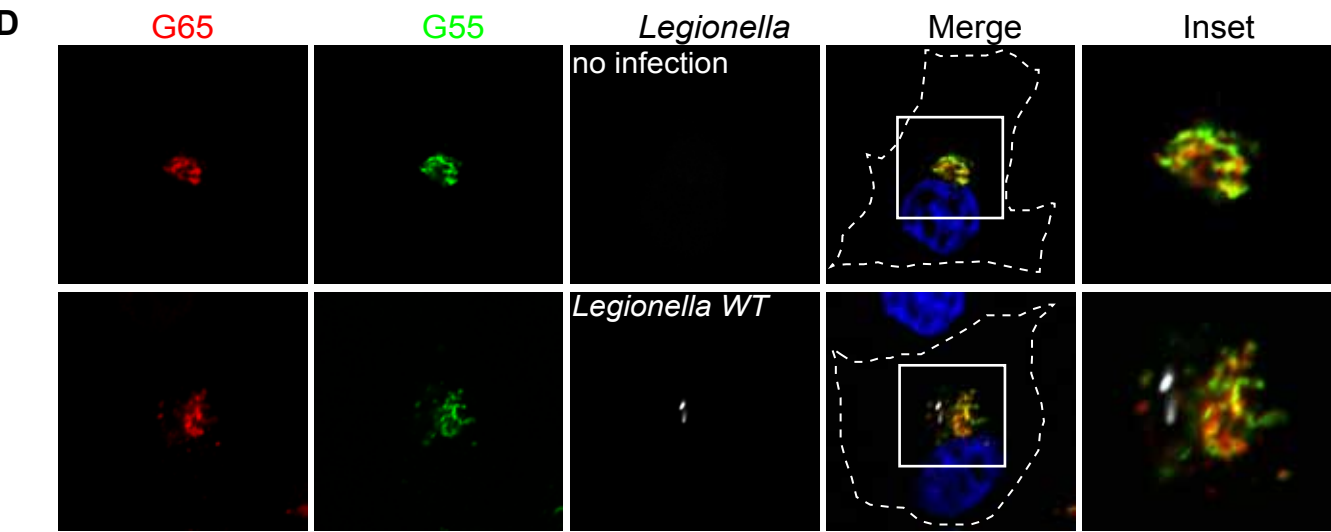

## Figure 8. SdeA-induced serine ubiquitination inhibits trafficking pathway

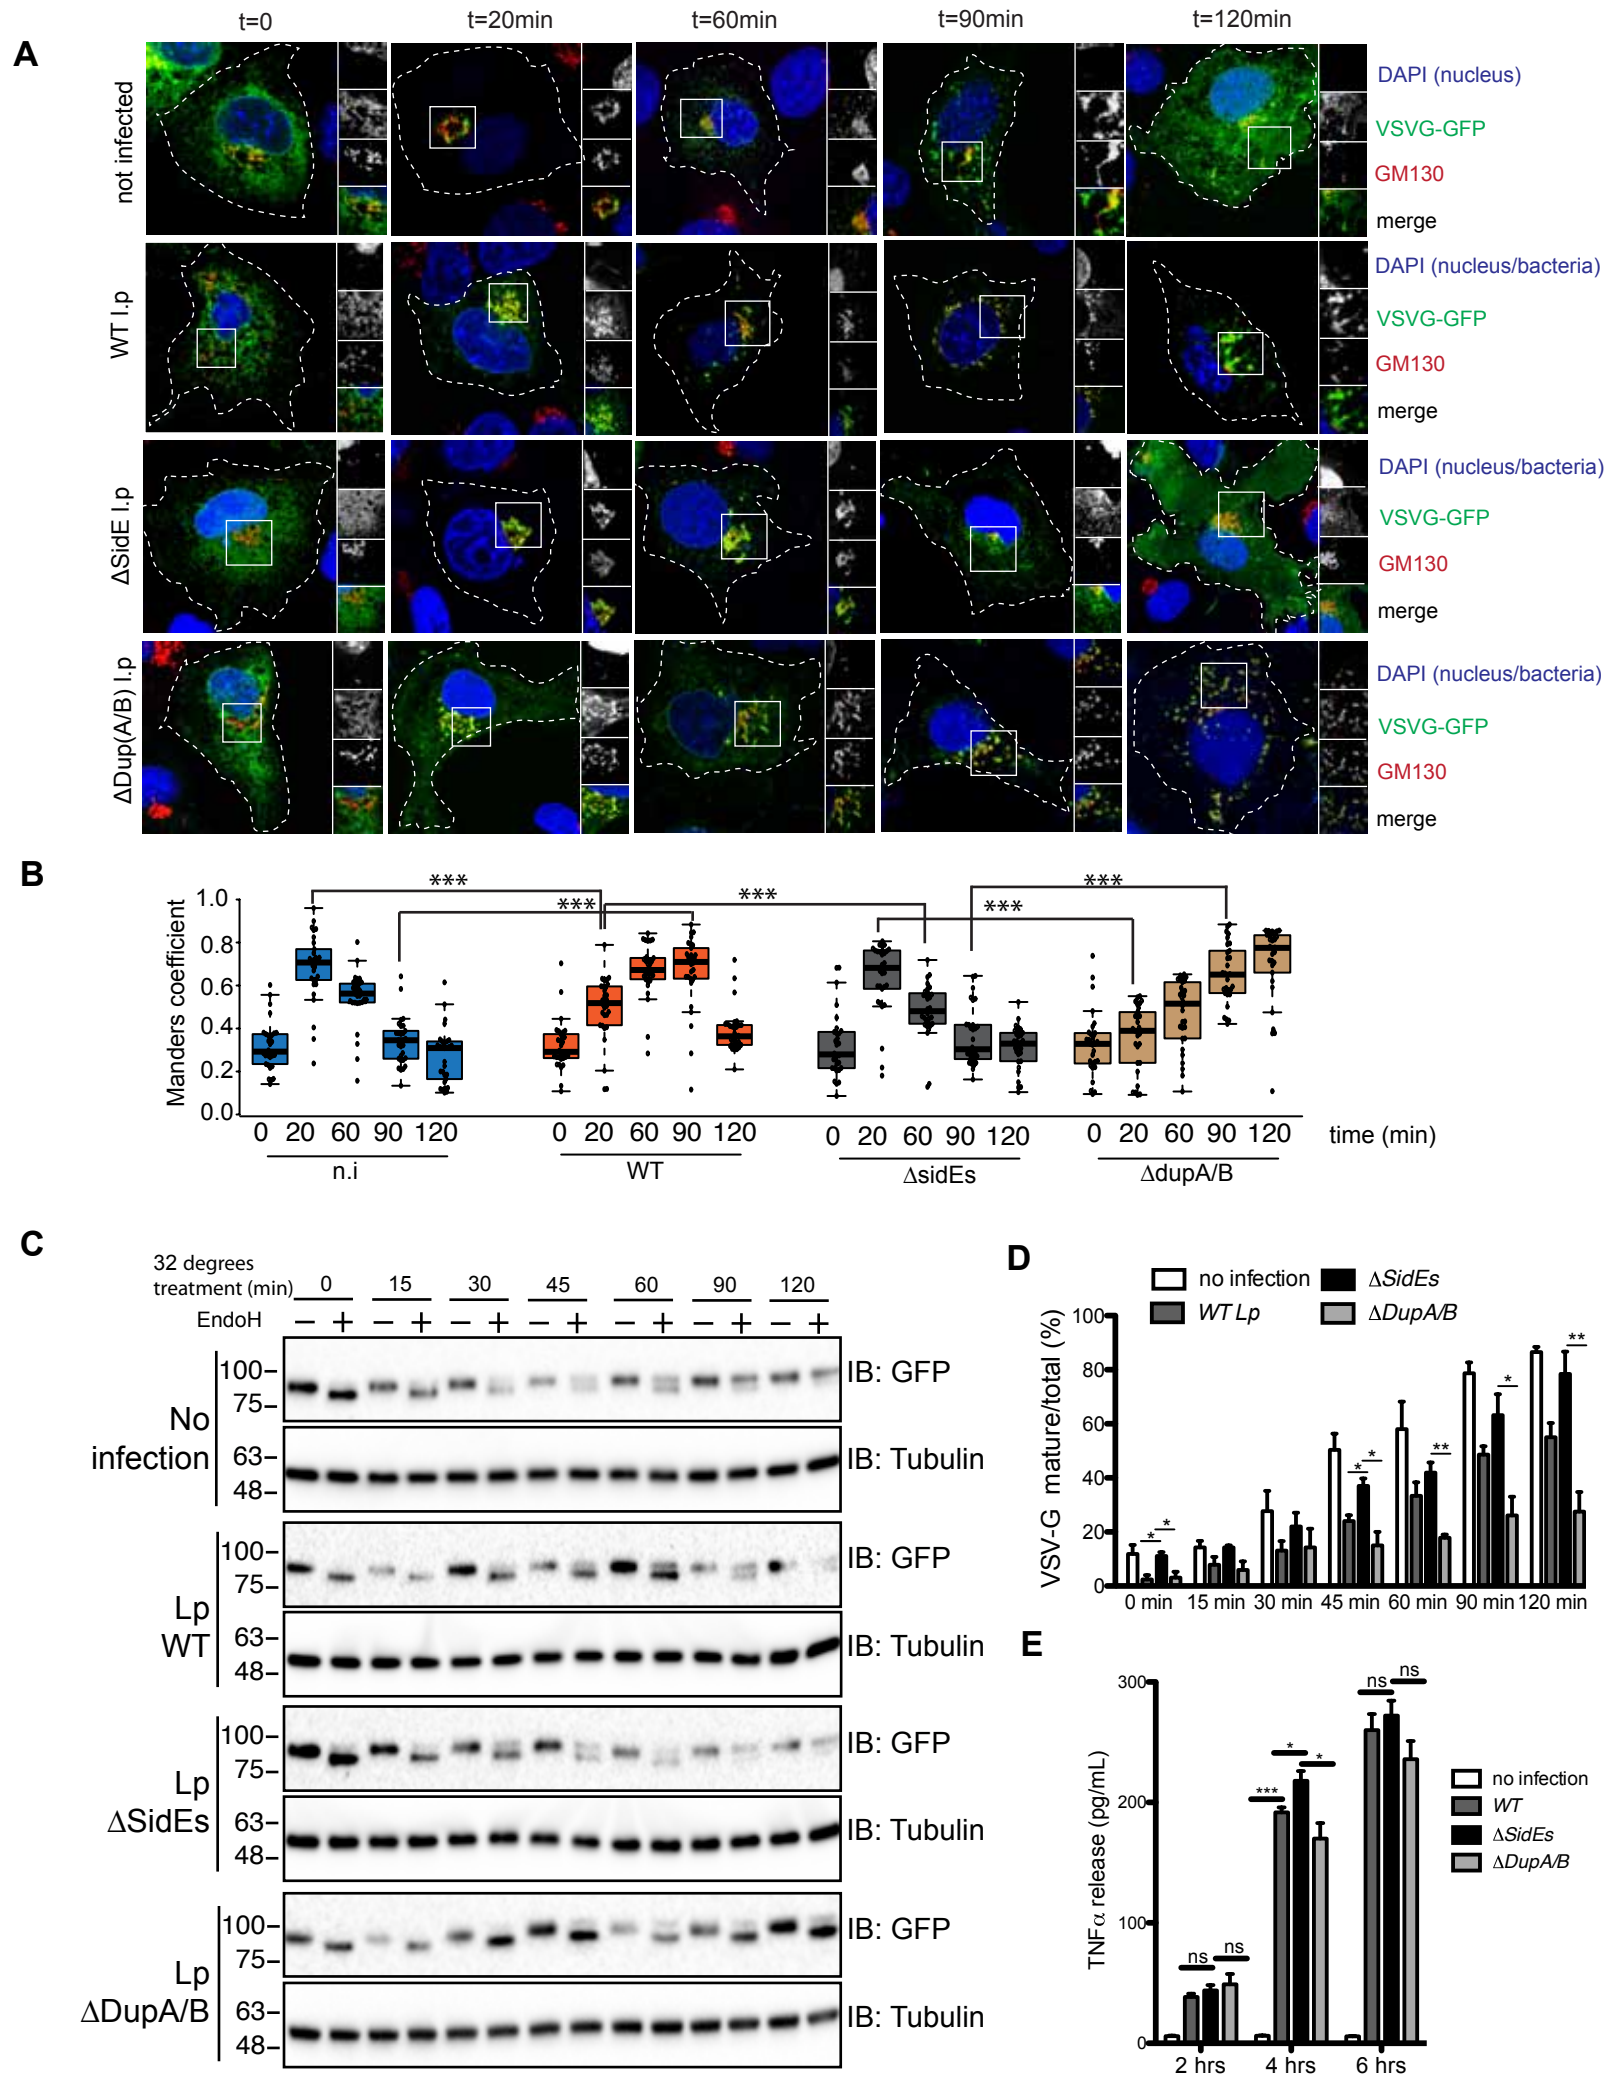

Figure 8-figure supplement 1. Golgi dynamics in cells expressing SdeA

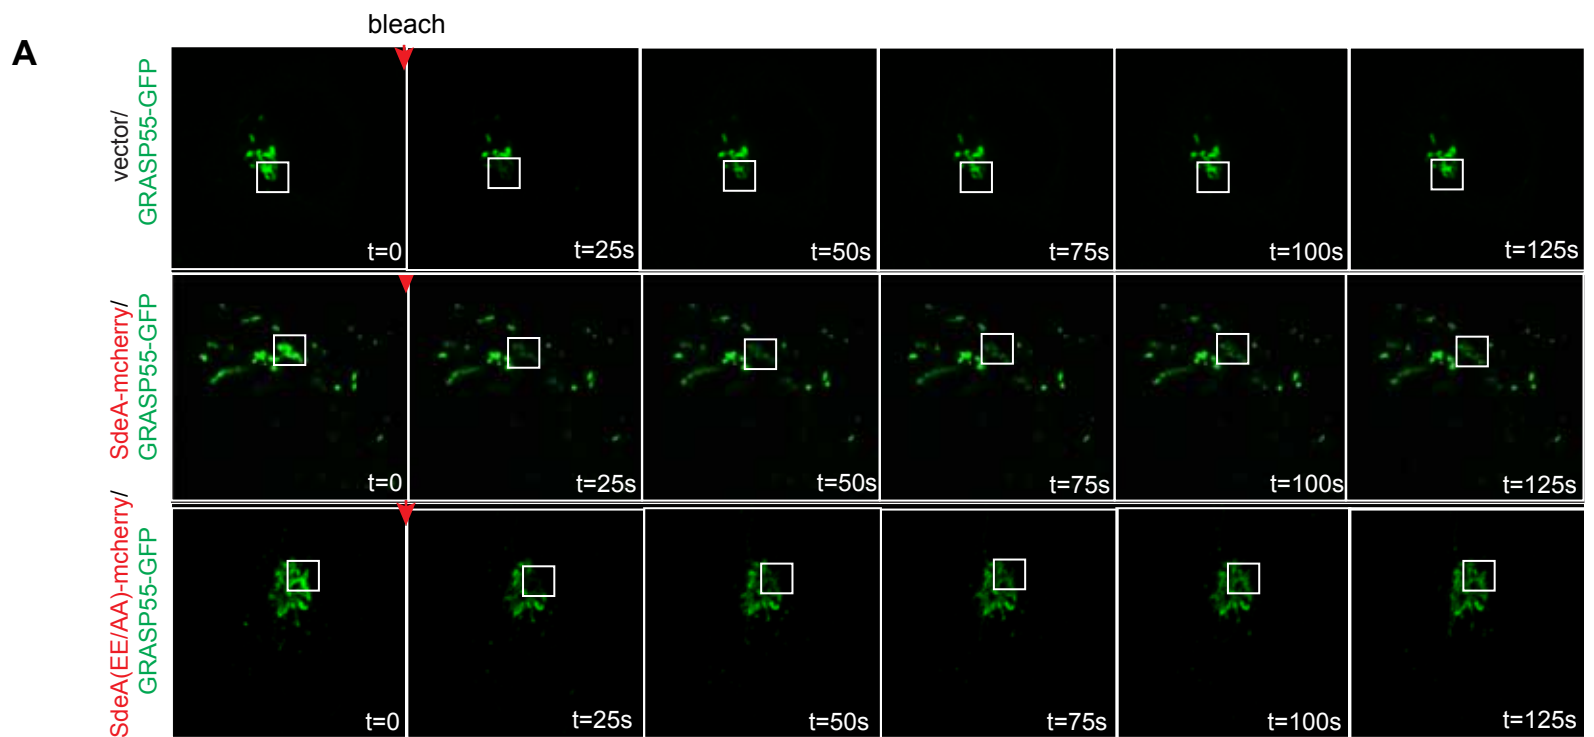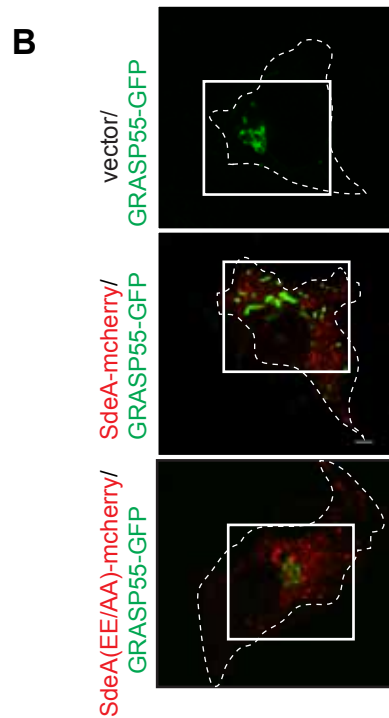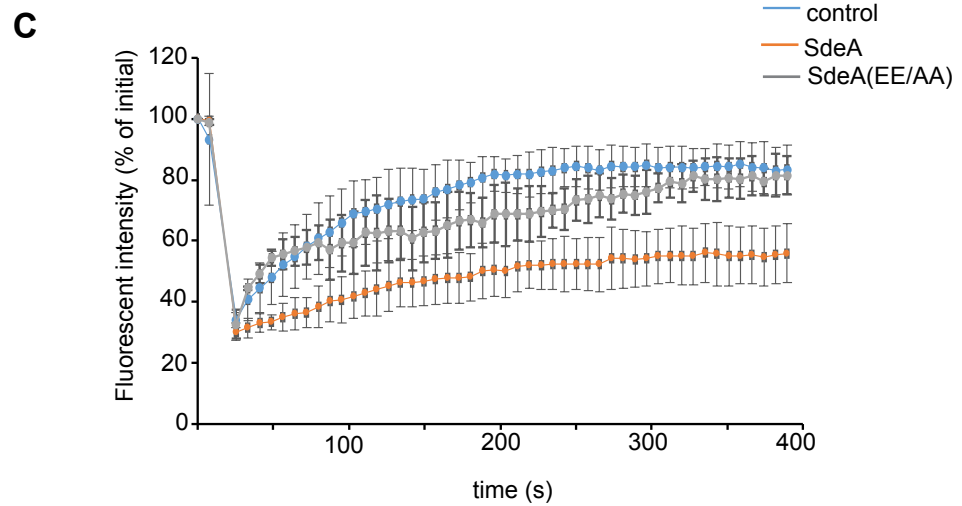

Figure 8-figure supplement 2. SdeA-induced serine ubiquitination inhibits trafficking pathway

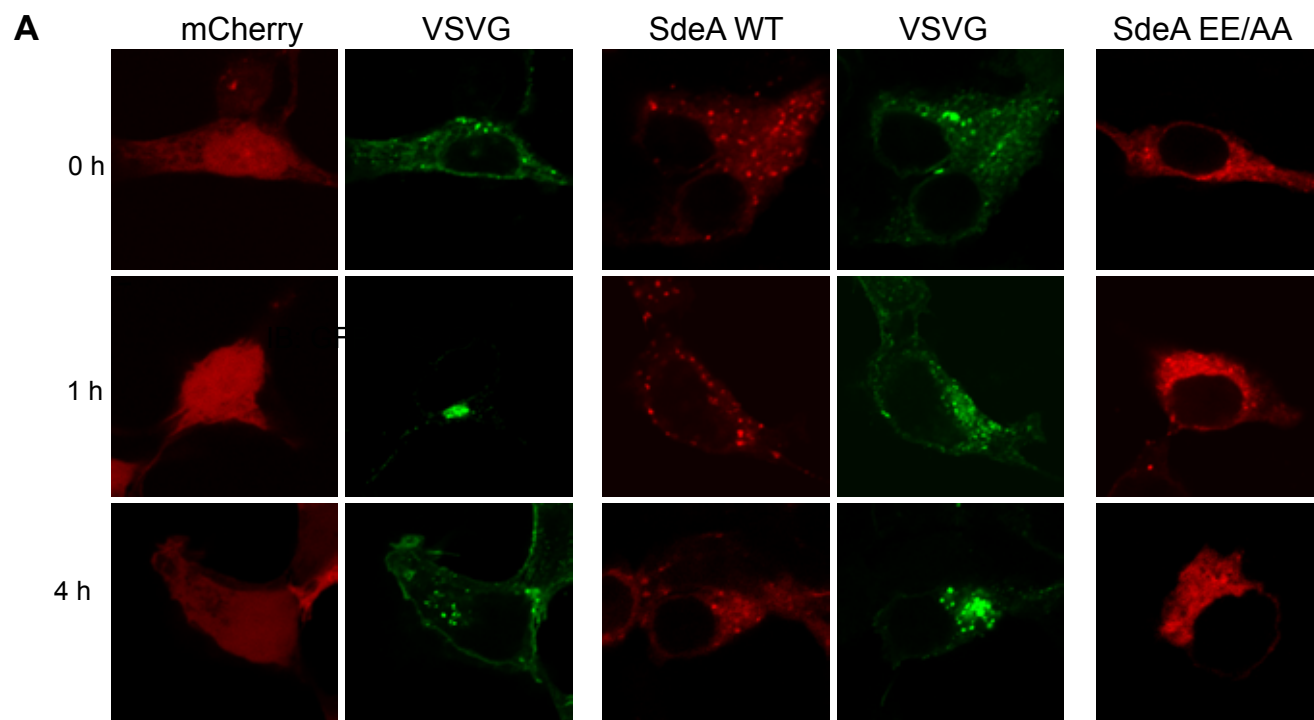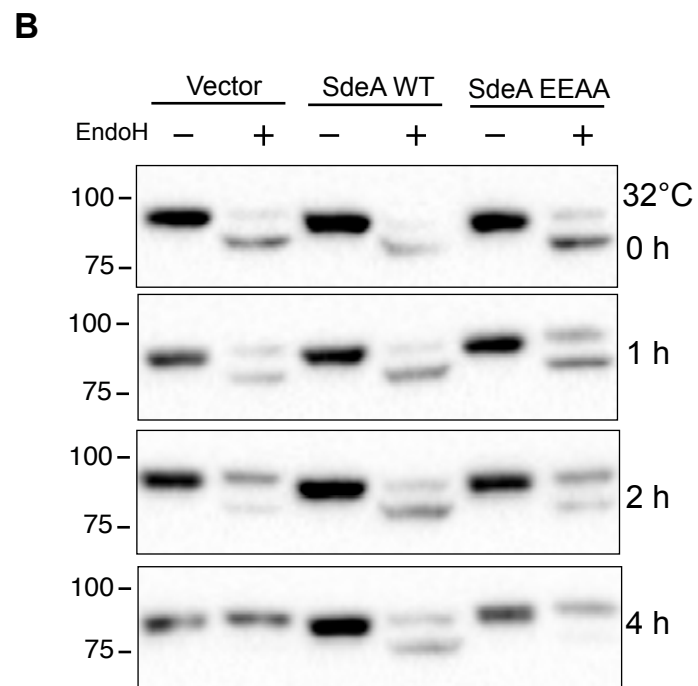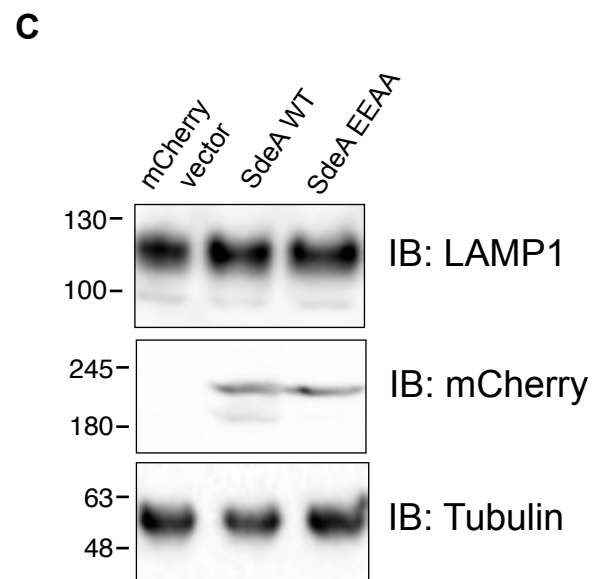

Source: https://www.biorxiv.org/content/10.1101/2020.07.27.223842v2.full.pdf
